# Supplementary material
Source: publisher figshare collection journal article supplement (https://acs.figshare.com/ndownloader/files/4413949)
Supplement: Supplementary file 1 [file 4413949]

## Supporting Information

### Detection of Carbohydrate Binding Proteins Using Magnetic Relaxation Switches.

Ashish A. Kulkarni<sup>‡</sup>, Alison A. Weiss<sup>§</sup> and Suri S. Iyer<sup>\*‡</sup>

<sup>‡</sup> Department of Chemistry, University of Cincinnati, Cincinnati, Ohio. 45221-0172

<sup>§</sup>Department of Molecular Genetics, Biochemistry and Microbiology, University of Cincinnati, Cincinnati, Ohio. 45267-0524

#### General Methods:

All chemical reagents were of analytical grade, used as supplied without further purification unless indicated. Concanavalin A (ConA), *Galanthus Nivalis* lectin (GNL), *Ricinus communis* lectin (RCA120) and Ricin toxin were purchased from Vector Laboratories. ConA was dialysed in PBS buffer as reported by Cloninger et. al.<sup>1</sup> Ricin was also dialysed before use. Shiga toxins 1 and 2 were isolated as previously described.<sup>2</sup> Acetic anhydride and acetyl chloride were distilled under an inert atmosphere and stored under argon. 4Å Molecular sieves were stored in an oven (>130 °C) and cooled *in vacuo*. The acidic ion-exchange resin used was Dowex-50 and Amberlite. (H<sup>+</sup> form) Analytical thin layer chromatography (TLC) was conducted on silica gel 60-F254 (Merck). Plates were visualized under UV light, and/or by treatment with acidic cerium ammonium molybdate followed by heating. Column chromatography was conducted using silica gel (230-400 mesh) from Qualigens. <sup>1</sup>H and <sup>13</sup>C NMR spectra were recorded on Bruker AMX 400MHz spectrometer. Chemical shifts are reported in δ (ppm) units using <sup>13</sup>C and residual <sup>1</sup>H signals from deuterated solvents as references. Spectra were analyzed with Mest-Re-C Lite (Mestrelab Research) and/or XWinPlot (Bruker Biospin). Electrospray ionization mass spectra were recorded on a Micromass Q ToF 2 (Waters) and data were analyzed with MassLynx 4.0 (Waters) software.

---

**Abbreviations:** 2-chloro-4,6-dimethoxy-1,3,5-triazine, CDMT; *N*-methyl morpholine, NMM; *N,N* Dimethyl formamide, DMF; Ethyl acetate, EtOAc; Triisopropylsilane, TIPS; Trifluoroacetic acid, TFA; Acetonitrile, CH<sub>3</sub>CN; Dichloromethane, DCM; Dichloroethane, DCE; Trifluoromethanesulfonic anhydride, Tf<sub>2</sub>O; Trimethylsilyltrifluoromethanesulfonate, TMSOTf; Hydrazine acetate, NH<sub>2</sub>NH<sub>2</sub>.HOAc; Trichloroacetonitrile, Cl<sub>3</sub>CCN; Triethylamine, NEt<sub>3</sub>; Methanol, CH<sub>3</sub>OH.

## A. Synthesis of glycoconjugates

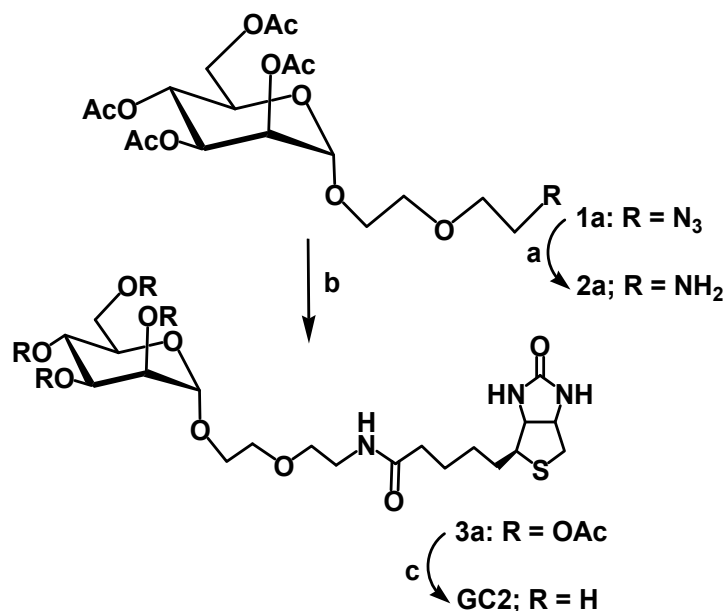

**Scheme 1.** *Reagents and conditions.* a. 10% Pd/C, EtOH, H<sub>2</sub>, RT, 4h, 91%. (b) D-Biotin, NMM, CDMT, THF, 0 °C, 48h, 50%. (c) NaOMe, MeOH, RT, 4h, 82%.

**Compound 2a:** 2-(2-Amino-ethoxy)-ethyl 2,3,4,6 tetra-O-acetate α-D-mannopyranoside.

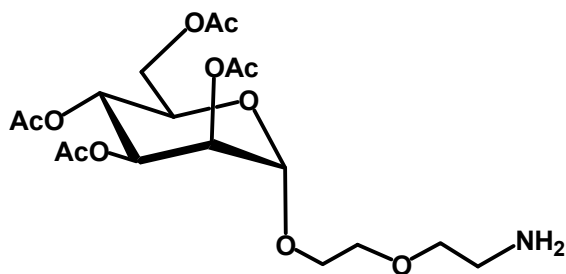

2-(2-Azido-ethoxy)-ethyl 2,3,4,6 tetra-O-acetate α-D-mannopyranoside, **1a** (0.90 g, 1.95 mmol) was dissolved in 4 mL of EtOAc and 4 mL of EtOH was added to it. Pd/C (450 mg) was added to it and mixture was stirred for 16 h under 1 atm hydrogen gas. Upon completion (TLC), the reaction mixture was filtered through a small pad of celite followed by washing with 3 X 10 mL EtOH. The solvent was evaporated in *vacuo*. The crude product was purified by flash column chromatography, eluting with 70:30 mixture of EtOAc and hexane, to give compound **2a** as a white solid (0.78 g, 91%). Spectral data matched reported values.<sup>3</sup>

**Compound 3a: 2,3,4,6-Tetra-O-acetyl-(S-D-biotinoyl-5-amino-3-oxopentyl)- $\alpha$ -D-mannopyranoside.**

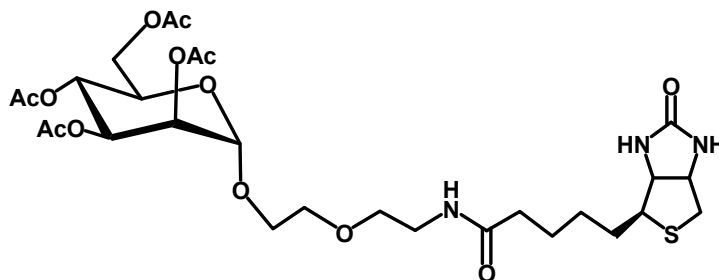

D-biotin (56.1 mg, 0.23 mmol) was dissolved in 1 mL of THF and cooled to 0 °C. CDMT (29.2 mg, 0.25 mmol) and NMM (55  $\mu$ L, 0.50 mmol) was added and stirred overnight at 0 °C. In a separate flask, **2a** (50 mg, 0.12 mmol) was dissolved in 1 mL of THF and the contents were added to the previous solution. The mixture was stirred for 48 h, slowly warming to rt. Upon completion (TLC), the solvent was evaporated and the residue was dissolved in EtOAc and washed with saturated NaHCO<sub>3</sub>. The organic layer was dried over anhydrous Na<sub>2</sub>SO<sub>4</sub>, filtered, concentrated in *vacuo* and the product was purified by flash column chromatography, eluting with 90:10 mixture of CH<sub>2</sub>Cl<sub>2</sub> and MeOH to give **3a** as a light yellow syrupy solid (48 mg, 63%). <sup>1</sup>H NMR (CDCl<sub>3</sub>):  $\delta$  6.67 (bs, 1H), 6.49 (bs, 1H), 5.73 (bs, 1H), 5.34-5.23 (m, 3H), 4.91 (s, 1H), 4.52-4.49 (m, 1H), 4.33-4.24 (m, 1H), 4.14-4.01 (m, 2H), 3.81-3.40 (m, 8H), 3.17-3.12 (m, 1H), 2.92 (dd, *J* = 4.8 Hz, 12.8 Hz), 2.74 (d, 12.8 Hz), 2.25 (t, 2H), 2.16 (s, 3H), 2.10 (s, 3H), 2.05 (s, 3H), 2.00 (s, 3H), 1.77-1.61 (m, 4H), 1.47-1.42 (m, 2H), 1.26-1.23 (m, 1H). <sup>13</sup>C NMR (CDCl<sub>3</sub>):  $\delta$  173.43, 170.71, 170.26, 170.03, 169.74, 164.01, 97.54, 70.17, 69.83, 69.63, 68.99, 68.48, 67.03, 66.18, 62.54, 61.82, 60.19, 55.63, 40.55, 39.15, 35.90, 28.26, 28.12, 25.64, 20.95, 20.79, 20.74. HRMS calculated for [C<sub>28</sub>H<sub>43</sub>N<sub>3</sub>O<sub>13</sub>SN<sup>+</sup>]: 684.2415. Found 684.2383.

**Compound GC2: (S-D-biotinoyl-5-amino-3-oxopentyl)- $\alpha$ -D-mannopyranoside.**

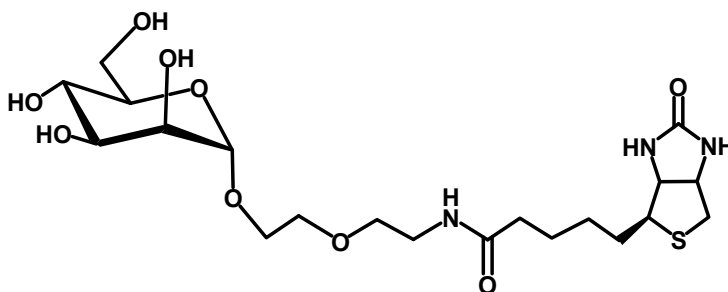

Compound **3a** (48 mg, 0.073 mmol) was dissolved in MeOH (2 mL) and a solution of NaOMe in MeOH (0.5M, 0.5 mL) was added. The reaction mixture was stirred at rt for 6h. The

reaction was neutralized by careful addition of Amberlite-15 H<sup>+</sup> resin and the resin was filtered. The solvent was removed in *vacuo* and the residue was purified by Biogel P-2 gel column chromatography, eluting with water, to give **GC2** as a white solid. (29 mg, 82%) <sup>1</sup>H NMR (D<sub>2</sub>O):  $\delta$  4.88 (d, *J* = 1.6 Hz, 1H), 4.62-4.59 (m, 1H), 4.44-4.41 (m, 1H), 3.96-3.95 (m, 1H), 3.89-3.34 (m, 10H), 3.41-3.31 (m, 3H), 3.02 (dd, *J* = 4.8, 12.8 Hz, 1H), 2.80 (d, *J* = 13.2, 1H), 2.29 (t, 2H), 1.77-1.37 (m, 4H), 1.45-1.37 (m, 2H). <sup>13</sup>C NMR (D<sub>2</sub>O): 176.94, 165.33, 99.89, 72.74, 70.51, 69.95, 69.32, 68.90, 66.72, 66.40, 62.08, 60.91, 60.24, 55.37, 39.68, 38.88, 35.46, 27.85, 27.67, 25.13. HRMS calculated for [C<sub>20</sub>H<sub>35</sub>N<sub>3</sub>O<sub>9</sub>SNa]<sup>+</sup>: 516.1992. Found 516.1953.

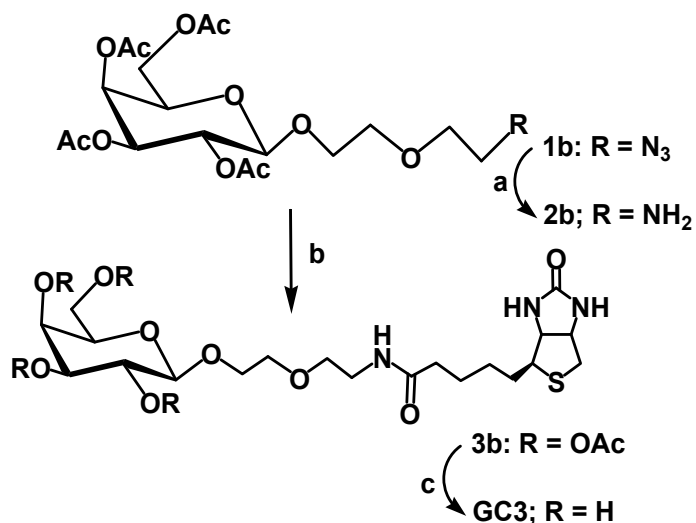

**Scheme 2.** *Reagents and conditions.* a. 10% Pd/C, EtOH, H<sub>2</sub>, RT, 4h, 98%. (b) D-Biotin, NMM, CDMT, THF, 0 °C, 48h, 3b, 55%. (c) NaOMe, MeOH, RT, 4h, 85%.

**Compound 2b:** 2-(2-Amino-ethoxy)-ethyl 2,3,4,6 Tetra-*O*-acetate  $\beta$ -D-galactopyranoside.

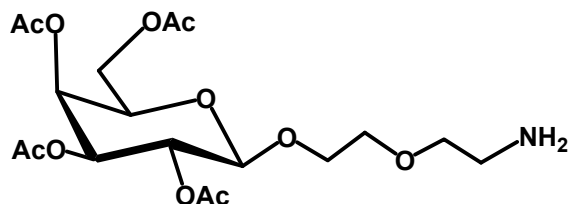

**2b** was synthesized in a similar manner from **1b** (50 mg, 0.11 mmol) as described for **2a** to yield **2b** as a white solid (46 mg, 98%). Spectral data matched reported values.<sup>4</sup>

**Compound 3b:** 2,3,4,6-Tetra-O-acetyl-(S-D-biotinoyl-5-amino-3-oxopentyl)- $\beta$ -D-galactopyranoside.

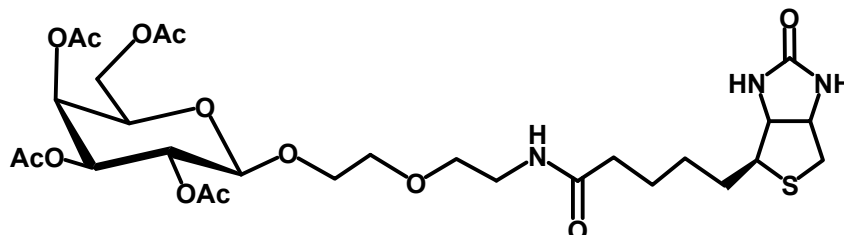

**3b** was synthesized in a similar manner from **2b** (30 mg, 0.068 mmol) as described for **2a** to yield **3b** as a light yellow syrupy solid (25 mg, 55%).  $^1\text{H}$  NMR ( $\text{CDCl}_3$ ):  $\delta$  6.57 (bs, 1H), 6.24 (bs, 1H), 5.40 (d,  $J = 2.8$  Hz, 1H), 5.21-5.17 (m, 1H), 5.06-5.03 (m, 1H), 4.55 (d,  $J = 8$  Hz, 2H), 4.34 (bs, 1H), 4.21-4.09 (m, 3H), 4.06-3.92 (m, 3H), 3.72-3.38 (m, 6H), 3.17 (bs, 1H), 2.93-2.90 (m, 1H), 2.76 (d,  $J = 12.8$  Hz, 1H), 2.34-2.20 (m, 2H), 2.15 (s, 3H), 2.06 (s, 3H), 2.04 (s, 3H), 1.99 (s, 3H), 1.83-1.60 (m, 4H), 1.49-1.46 (m, 2H), 1.27-1.24 (m, 3H).  $^{13}\text{C}$  NMR ( $\text{CDCl}_3$ ):  $\delta$  172.26, 170.47, 170.21, 170.17, 169.83, 101.49, 70.77, 70.73, 69.99, 69.75, 69.15, 68.92, 67.03, 61.84, 61.26, 60.23, 55.93, 55.46, 40.59, 39.10, 35.82, 29.71, 28.13, 25.53, 20.89, 20.73, 20.70, 20.63, 14.21. HRMS calculated for  $[\text{C}_{28}\text{H}_{43}\text{N}_3\text{O}_{13}\text{SNa}]^+$ : 684.2415. Found 684.2383.

**Compound 4b:** (S-D-biotinoyl-5-amino-3-oxopentyl)- $\alpha$ -D-galactopyranoside.

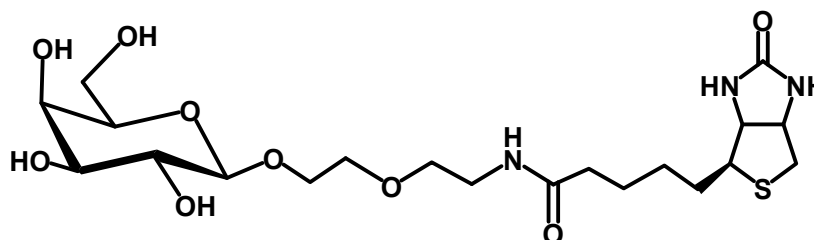

**GC3** was synthesized in a similar manner from **3b** (20 mg, 0.032 mmol) as described for **3a** to yield **GC3** as a white solid (16 mg, 85%).  $^1\text{H}$  NMR ( $\text{D}_2\text{O}$ ):  $\delta$  4.63-4.59 (m, 1H), 4.44-4.41 (m, 2H), 4.09-4.00 (m, 2H), 3.92-3.91 (m, 1H), 3.85-3.63 (m, 12H), 3.55-3.51 (m, 2H), 3.41-3.34 (m, 6H), 3.02-2.97 (m, 2H), 2.80-2.76 (d,  $J = 12.8$  Hz, 1H), 2.30-2.26 (m, 3H), 1.76-1.39 (m, 11H).  $^{13}\text{C}$  NMR ( $\text{D}_2\text{O}$ ):  $\delta$  102.90, 75.17, 72.75, 70.77, 69.55, 68.75, 68.64, 60.99, 60.26, 55.34, 38.14, 35.44, 27.67, 25.10. HRMS calculated for  $[\text{C}_{20}\text{H}_{35}\text{N}_3\text{O}_9\text{SNa}]^+$ : 516.1992. Found 516.1953.

**B. Calculation of the amount of ligands on the bead.**

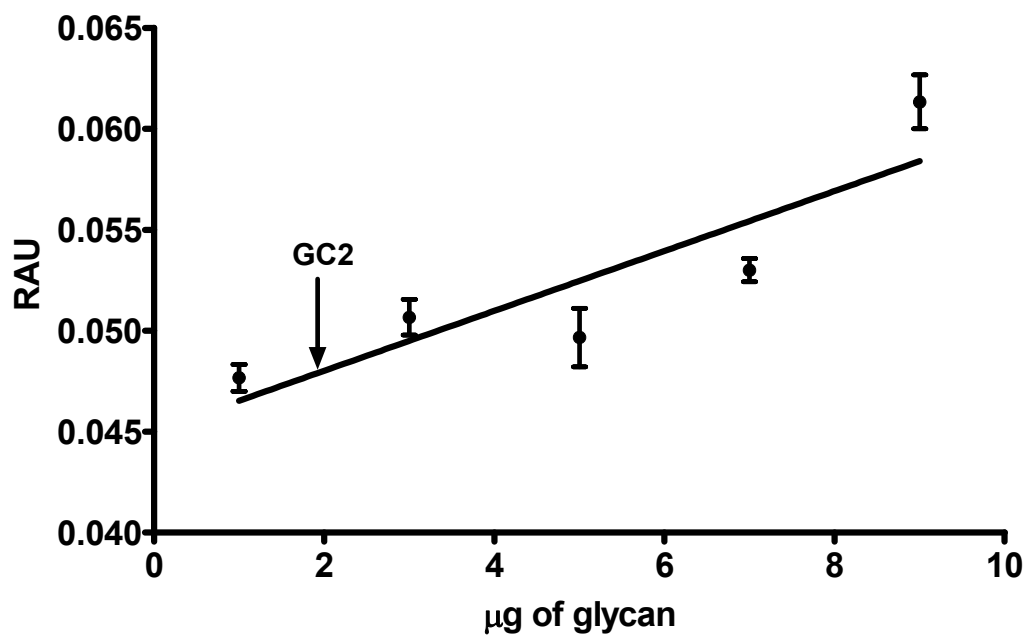

**Figure 1.** The plot of amount of glycan ( $\mu\text{g}$ ) versus absorbance. The concentration of glycans on the bead for **GC2** is represented by an arrow.

### C. Magnetic properties of the carbohydrate coated micrometer beads.

| Property                 | Micrometer Beads                      | GC coated beads                                                                                                                                                                                                              |
|--------------------------|---------------------------------------|------------------------------------------------------------------------------------------------------------------------------------------------------------------------------------------------------------------------------|
| Size (nm)                | 1000 (from manufacturer)              | -                                                                                                                                                                                                                            |
| Settling                 | <5% <sup>5</sup>                      | -                                                                                                                                                                                                                            |
| Ligands/bead             | -                                     | <b>GC1:</b> (tetra antennary $\alpha$ -mannoside coated beads ) $2 \times 10^6$<br><b>GC2</b> ( $\alpha$ -mannoside coated beads):<br>$1 \times 10^6$<br><b>GC3</b> ( $\beta$ -galactoside coated beads):<br>$1 \times 10^6$ |
| $R_1 / S^{-1}$ per mM Fe | <1                                    | <1                                                                                                                                                                                                                           |
| $R_2 / S^{-1}$ per mM Fe | 45                                    | 44                                                                                                                                                                                                                           |
| M / emu per g Fe         | 105 (from manufacturer)               | -                                                                                                                                                                                                                            |
| Fe atoms per particle    | $2.8 \times 10^9$ (from manufacturer) | -                                                                                                                                                                                                                            |

**Table 1.** Physical and chemical characterization of carbohydrate coated micrometer beads. The streptavidin coated beads were purchased from Invitrogen® (Catalog number: 650-01).

**D. Comparison of Concanavalin A (ConA) and Galanthus Nivalis lectin (GNL).**

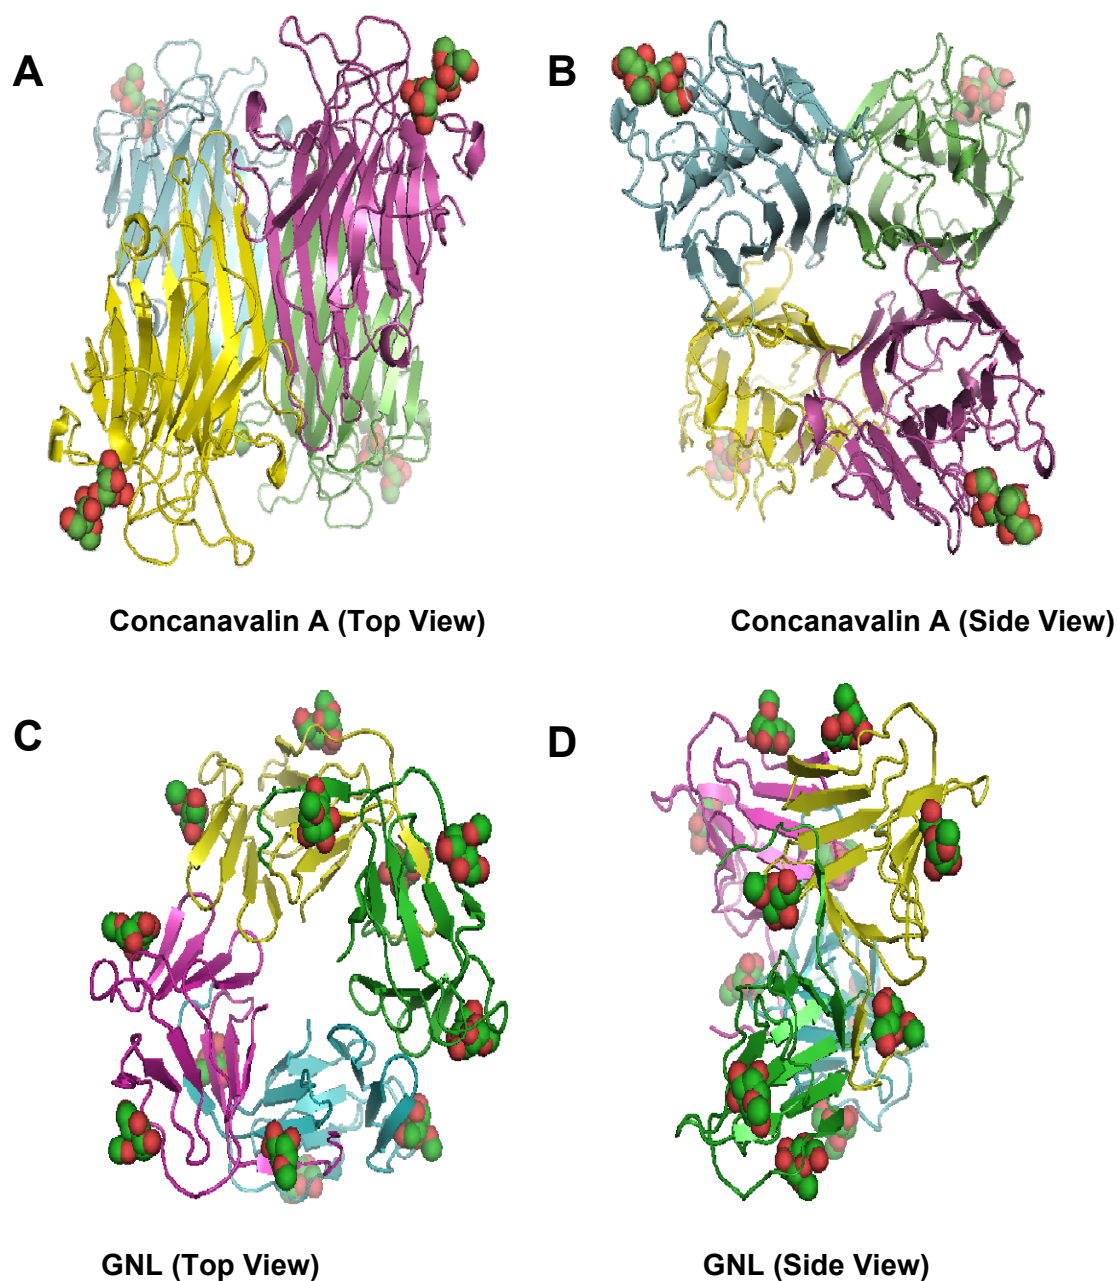

**Figure 2.** Top and Side view of **(A,B)** Concanavalin A<sup>6</sup> and **(C,D)** *Galanthus Nivalis* lectin (GNL)<sup>7</sup> depicting the different arrangement of the binding sites. The lectins and the glycans are represented in ribbon and ball-and-stick diagrams, respectively. The coordinates were downloaded from NCBI and the figure was generated using Pymol<sup>®</sup>.



## E. Transverse relaxation measurements.

The parameters used for the instrument are given as below.

| Status:         |             | Settings:       |             |
|-----------------|-------------|-----------------|-------------|
| Serial No.      | : ND2862    | 90 P1s.Len.[us] | : 2.28      |
| MBox Temp. [C]  | : 40.000    | 180P1s.Len.[us] | : 4.46      |
| Temp. Err. [C]  | : 0.000     | DetAngle.B[deg] | : 316       |
| Temp. Control   | : ON        | DetAngle.N[deg] | : 320       |
| Parameters:     |             | H Offs. [Steps] | : -345      |
| Scans           | : 8         | NMR Freq. [MHz] | : 59.950000 |
| Rd [s]          | : 2.00      | Pulse Atten[dB] | : 0         |
| Gain [dB]       | : 54        | Instr.Gain [db] | : 56        |
| Dig. Bw [Hz]    | : 20000     | DeadTime [ms]   | : 0.0058    |
| Ana. Bw         | : narrow    | Homog.Limit[ms] | : 0.20      |
| Offset Comp.    | : off       | Instr. Rd [s]   | : 2.00      |
| Det. Mode       | : magnitude | Stat Grad X [%] | : 0.00      |
| Magnitude Mode  | : PSD       | Stat Grad Y [%] | : 0.00      |
| Dig. Res.       | : high      | Stat Grad Z [%] | : 0.00      |
| Dummy Shots     | : 0         |                 |             |
| Pulse Atten[dB] | : 0         | SFC             | : no        |
| Gradient Unit   | : none      |                 |             |

**F. Analysis of the data to show  $\Delta T_2$  / min differences in the aggregation profiles.**

| Lectin                       | Figures | $\Delta T_2$ / min |
|------------------------------|---------|--------------------|
| GNL (1.9 nM)                 | 3A      | $1.25 \pm 0.09$    |
| ConA (1.9 nM)                |         | $0.34 \pm 0.12$    |
| Ricin (1.7 nM)               | 3B      | $1.01 \pm 0.36$    |
| RCA120 (1.7 nM)              |         | $1.34 \pm 0.08$    |
| GC1 (1.9 nM ConA)            | 3C      | $0.90 \pm 0.61$    |
| GC2 (1.9 nM ConA)            |         | $0.34 \pm 0.12$    |
| Antibody to RCA120 (0.85 nM) | 3D      | $1.59 \pm 0.05$    |
| RCA120 (0.85 nM)             |         | $0.63 \pm 0.15$    |

**Table 2.** Rate of increase in  $\Delta T_2$  per min for all curves from Figure 3 of the main manuscript.

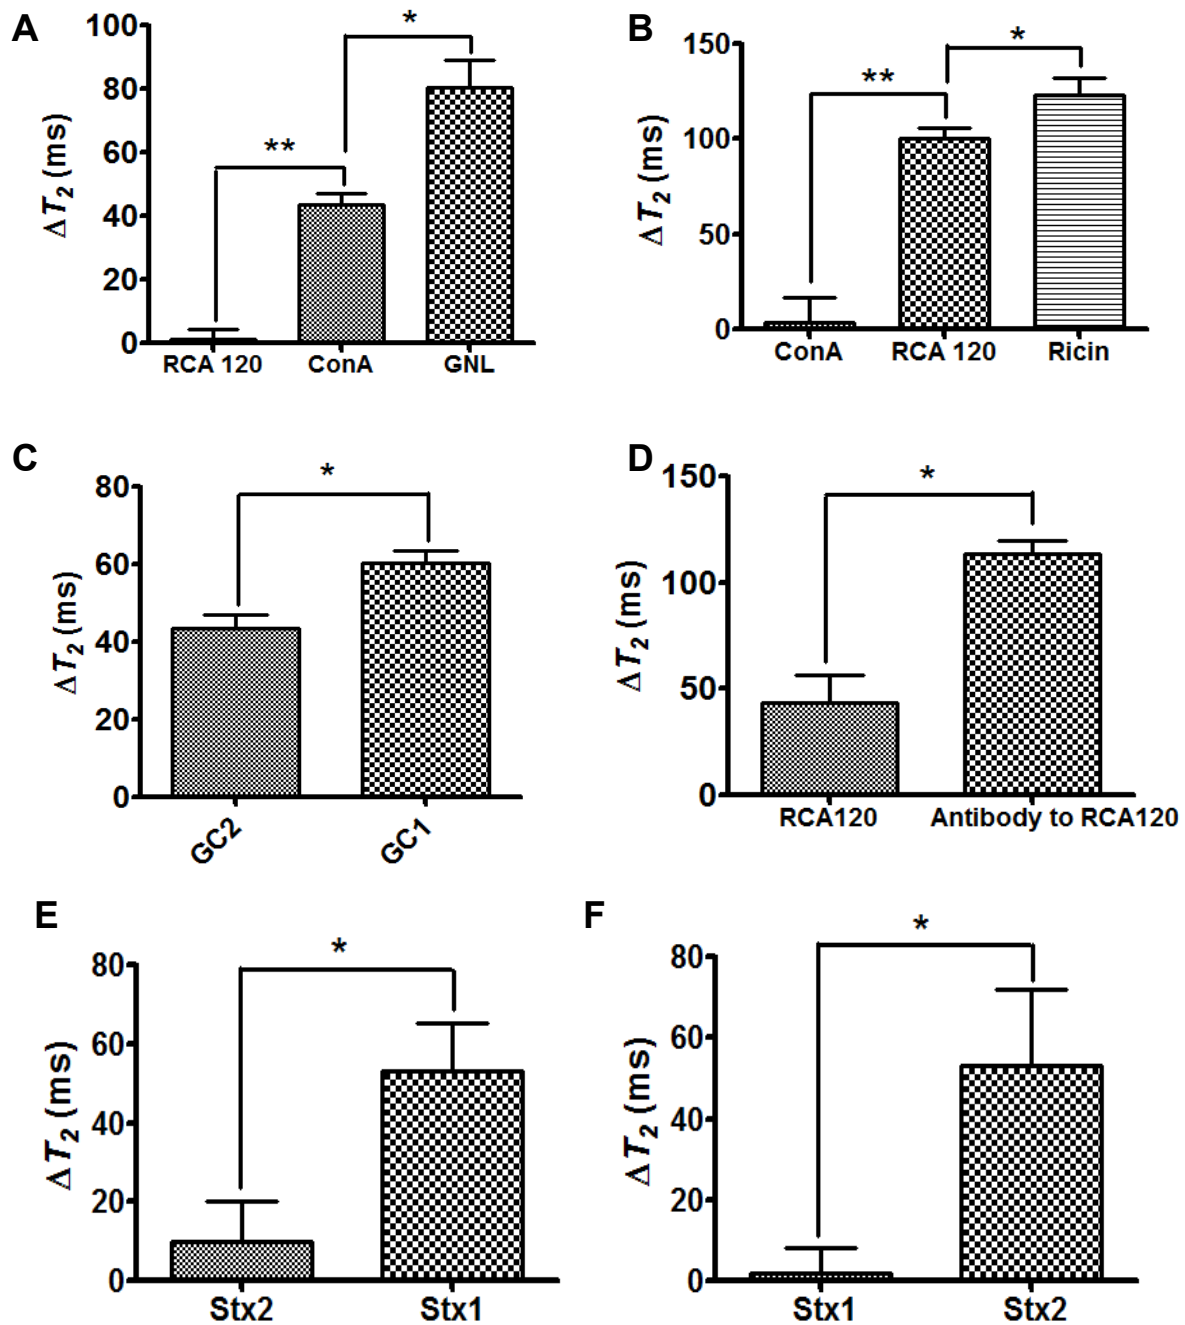

**Figure 4:** Statistical analysis of the binding of different proteins to carbohydrate coated beads. The data represents  $\Delta T_2$  at 85 min. (A) Detection of  $\alpha$ -mannoside binding proteins using GC2 coated magnetic beads. (B) Detection of  $\beta$ -galactoside binding proteins using GC3 coated magnetic beads. (C) Comparison of binding of ConA to GC1 and GC2 coated magnetic beads. (D) Increase in sensitivity by using GC3 and antibody specific to RCA120. (E) Selective detection of Stx 1 using Pk coated magnetic beads. (E) Selective detection of Stx2 using NHAc-Pk coated magnetic beads. \*\*:  $P < 0.008$ , \*:  $P < 0.04$ .

G.  $^1\text{H}$  and  $^{13}\text{C}$  NMRs of all compounds used in this study.

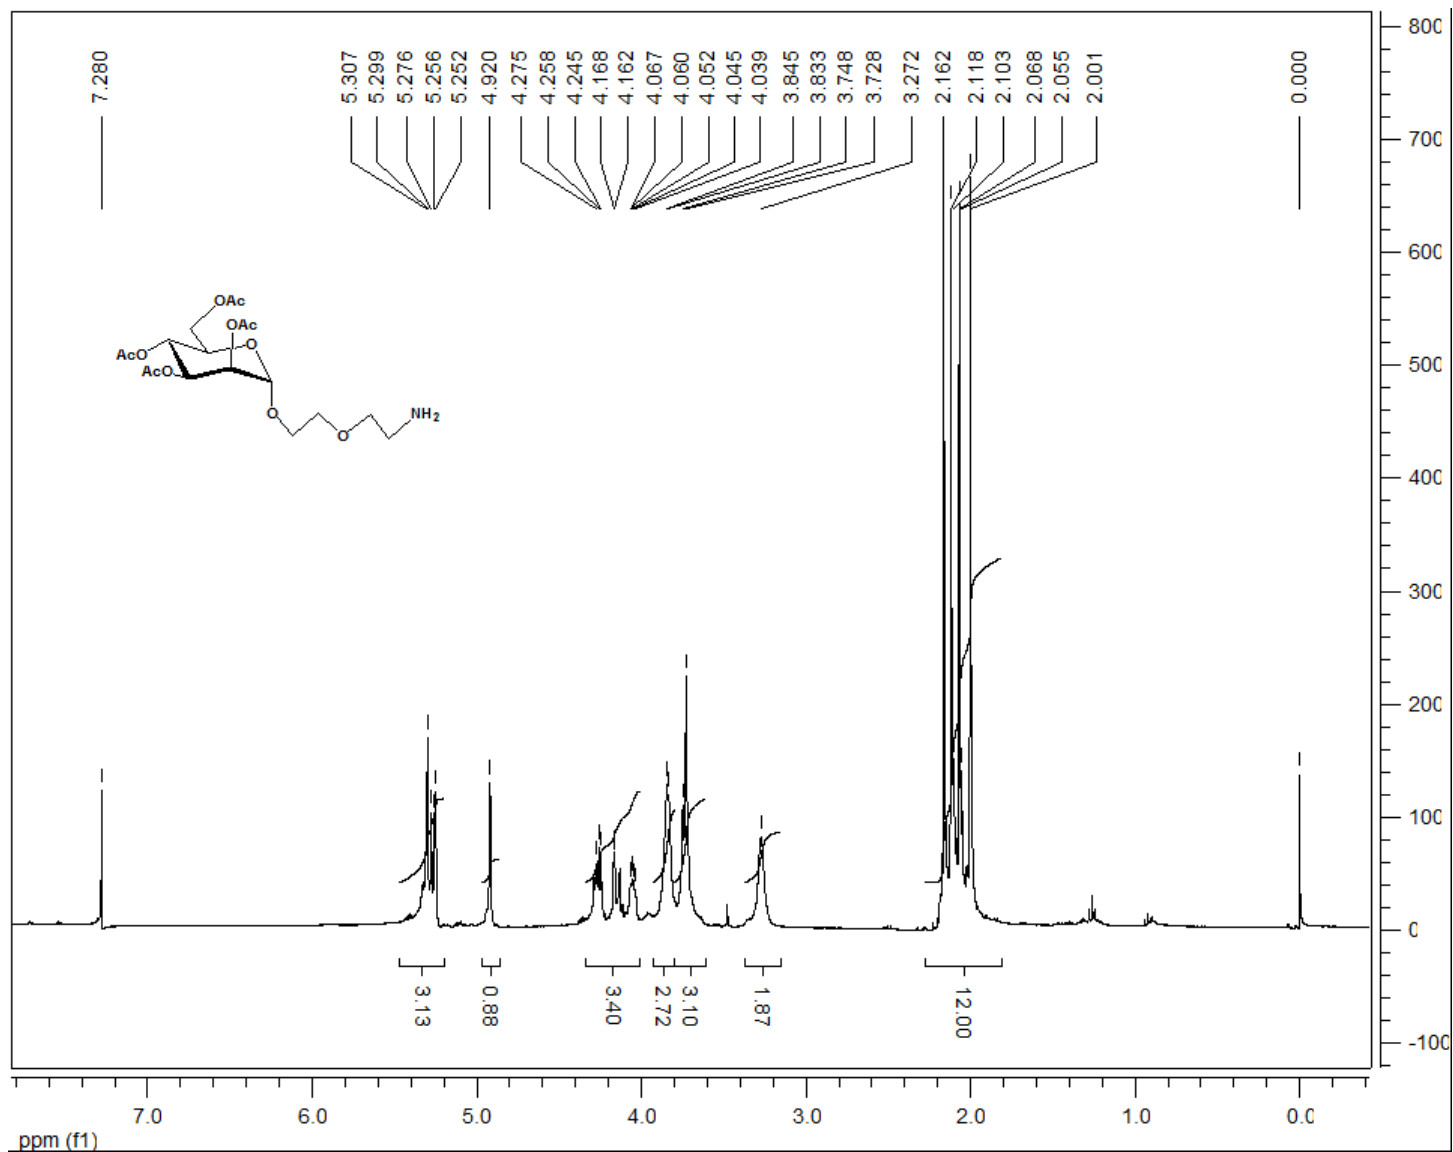

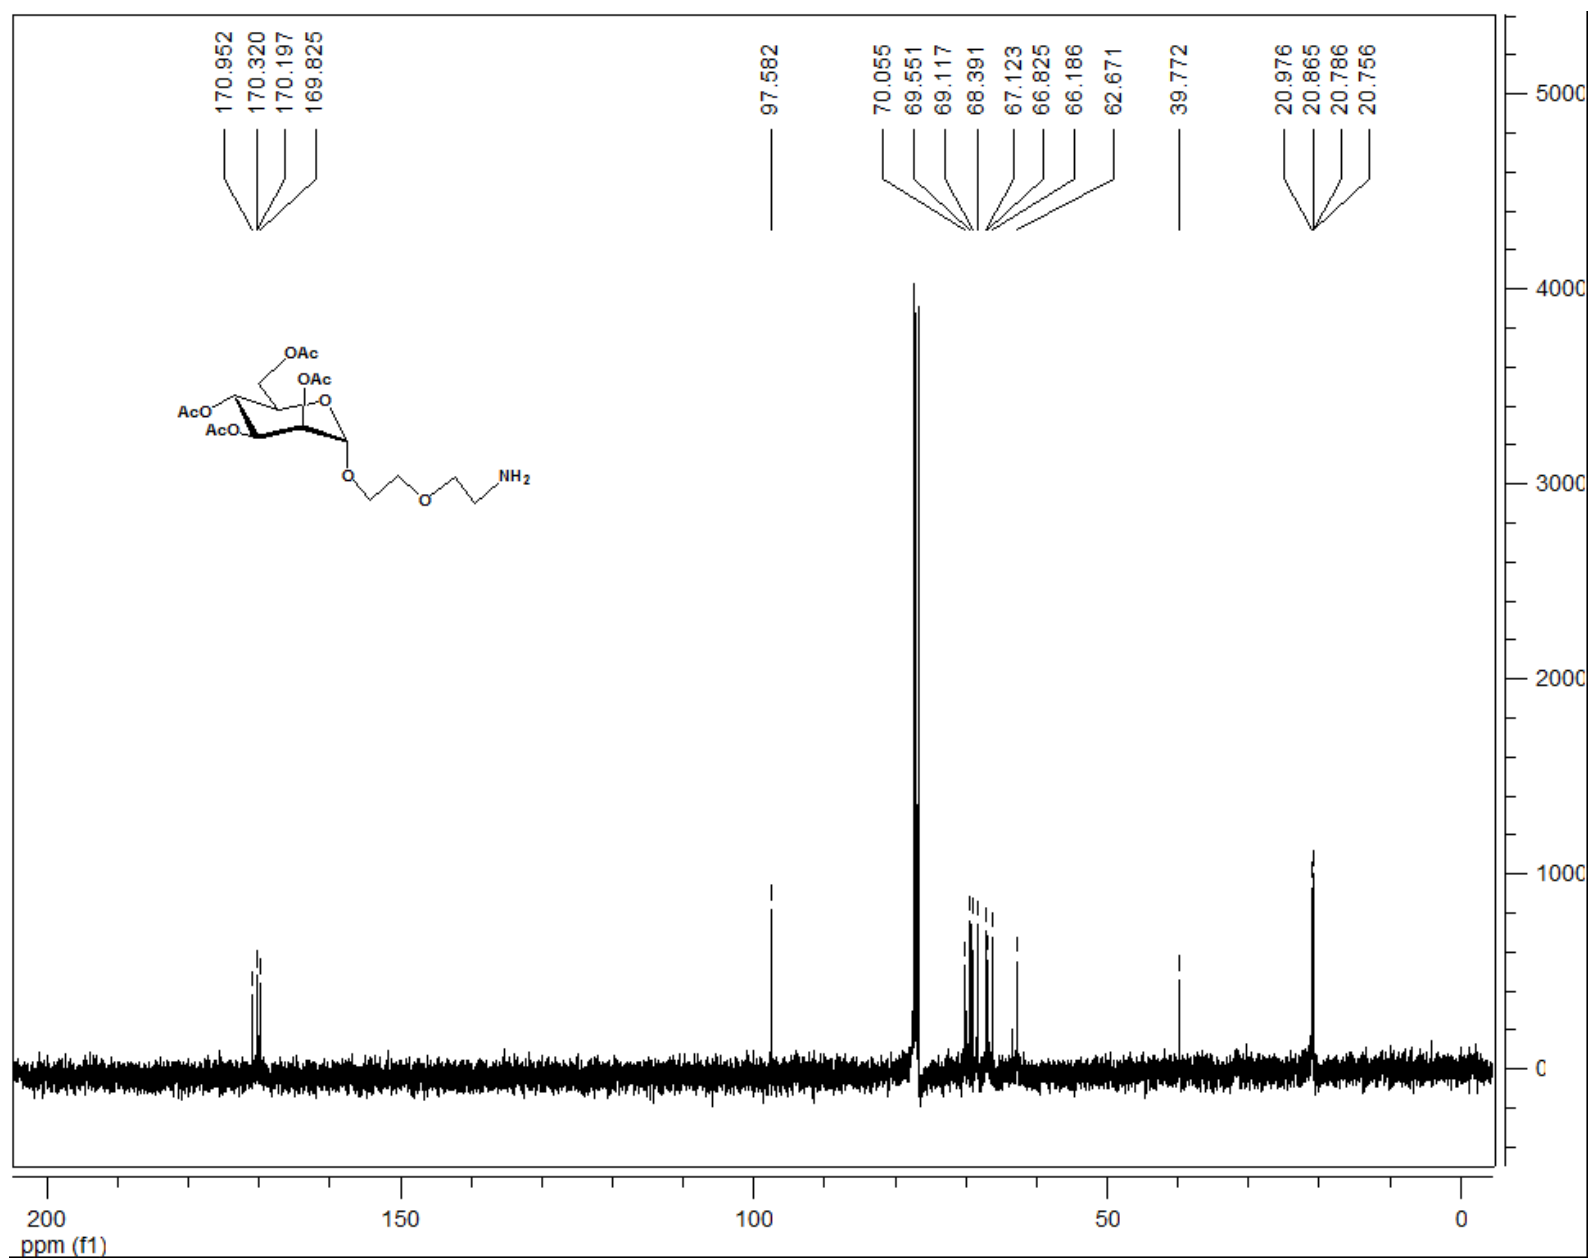

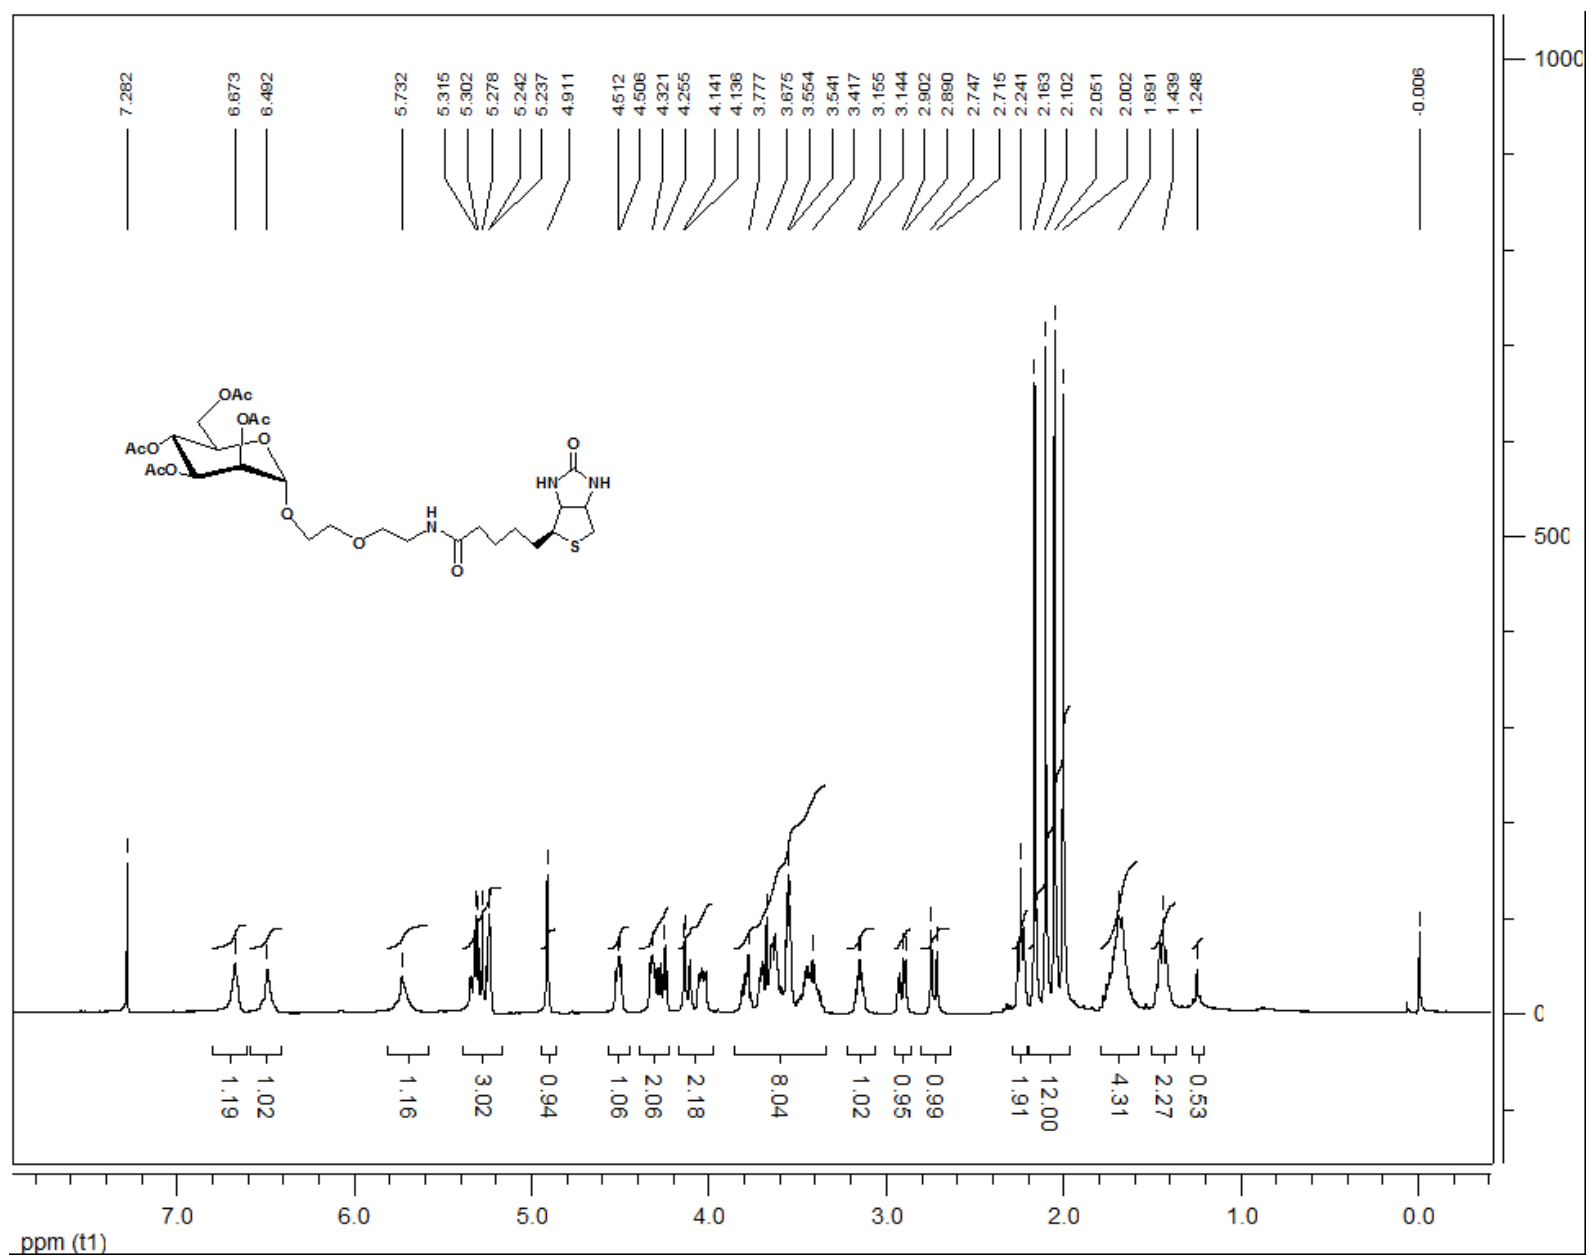

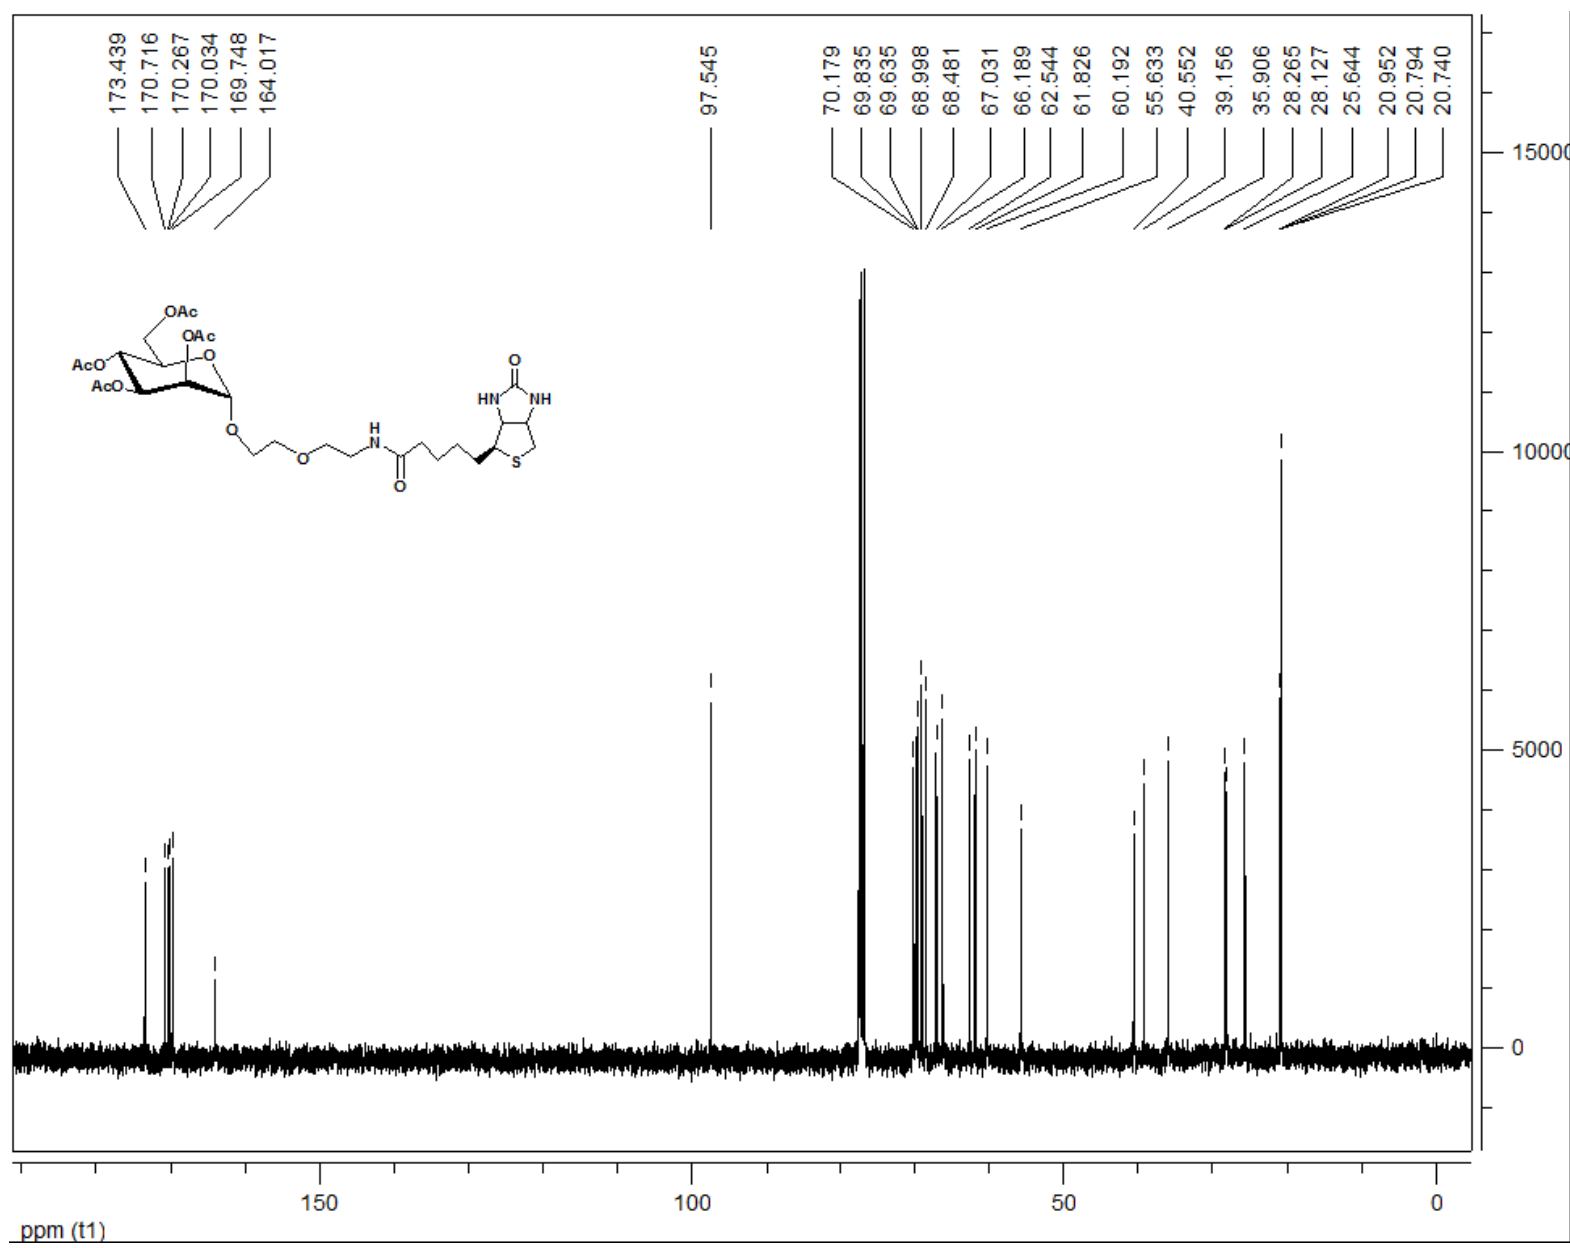

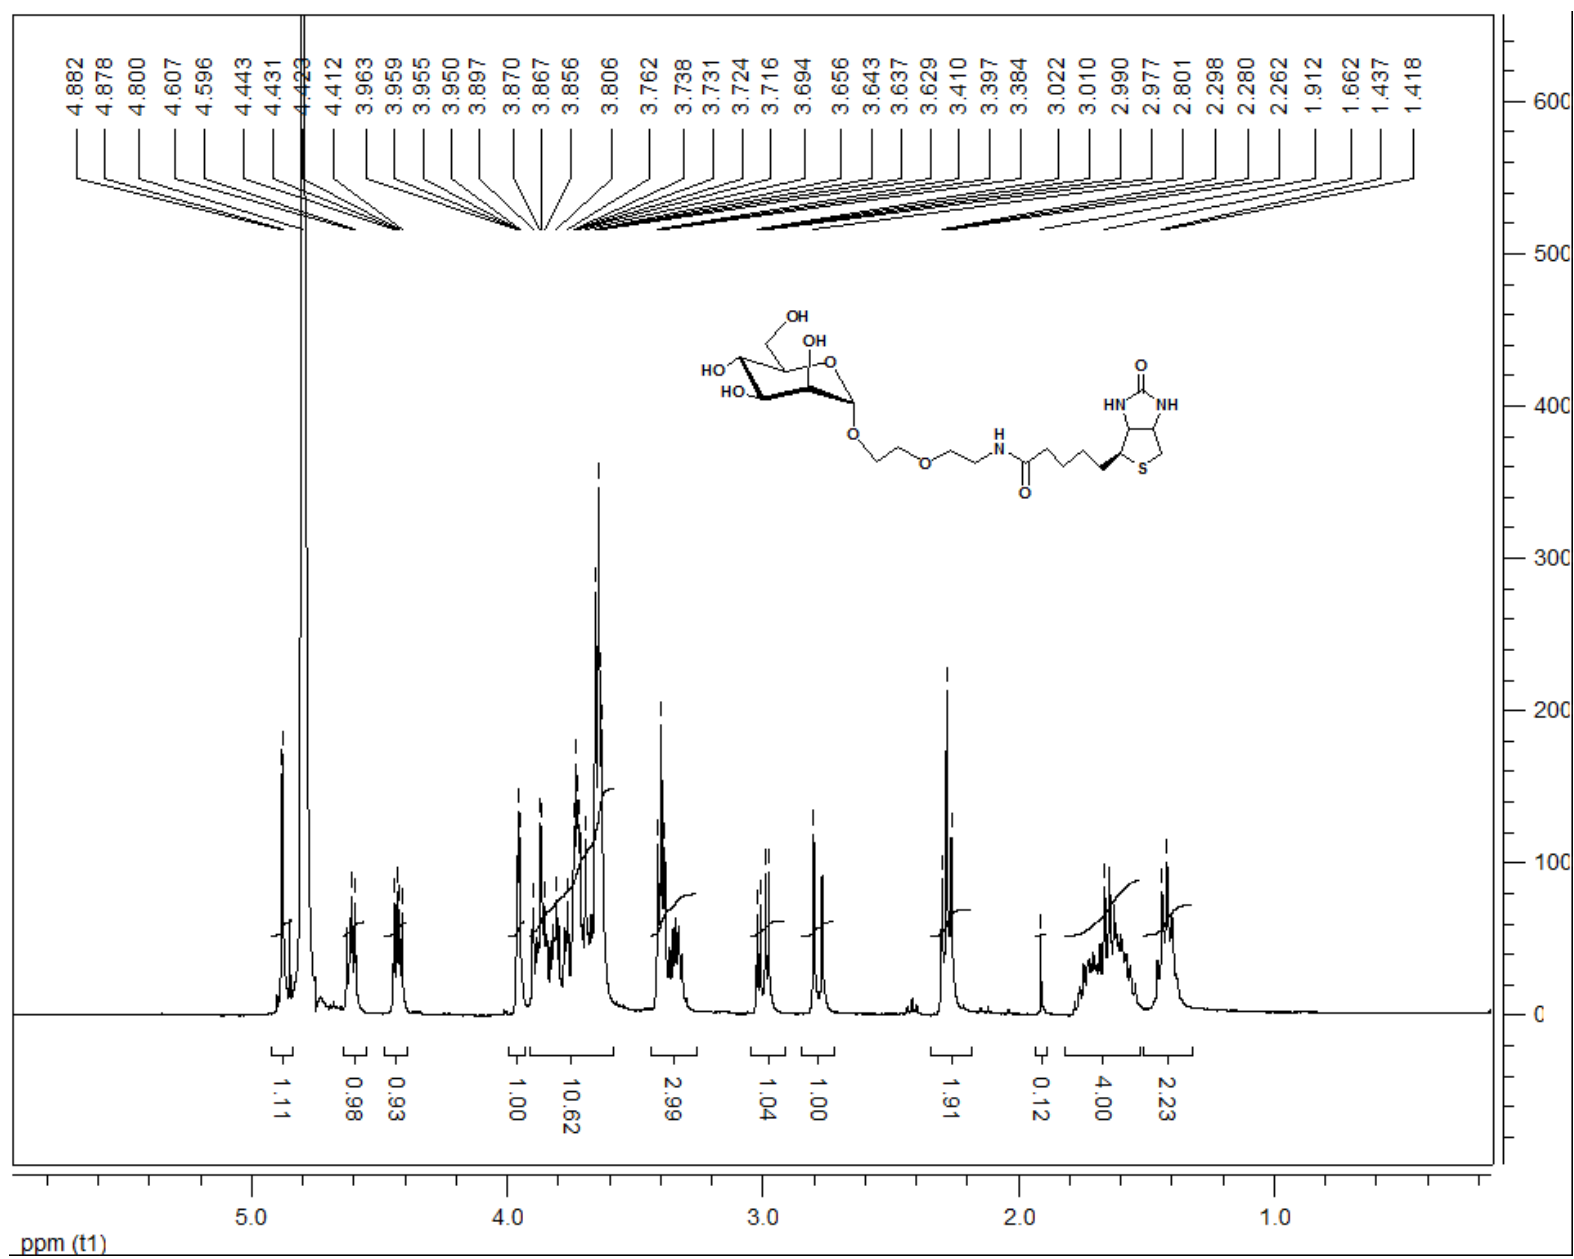



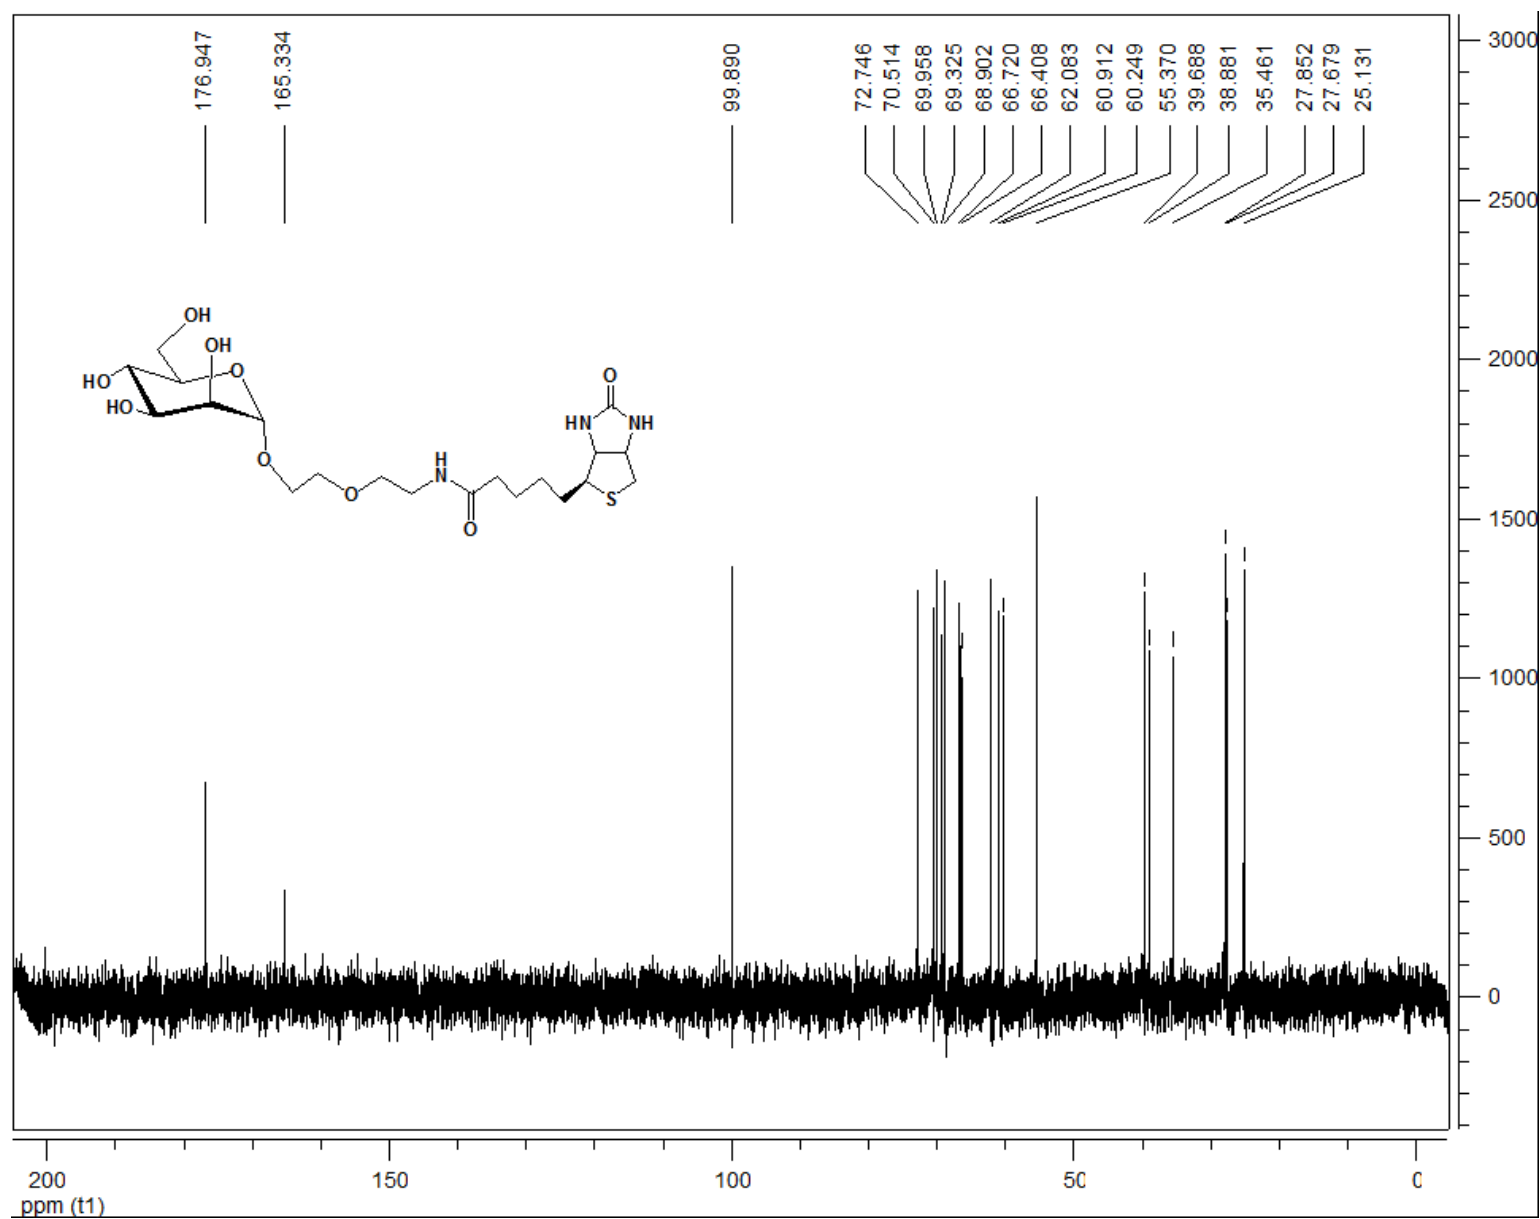

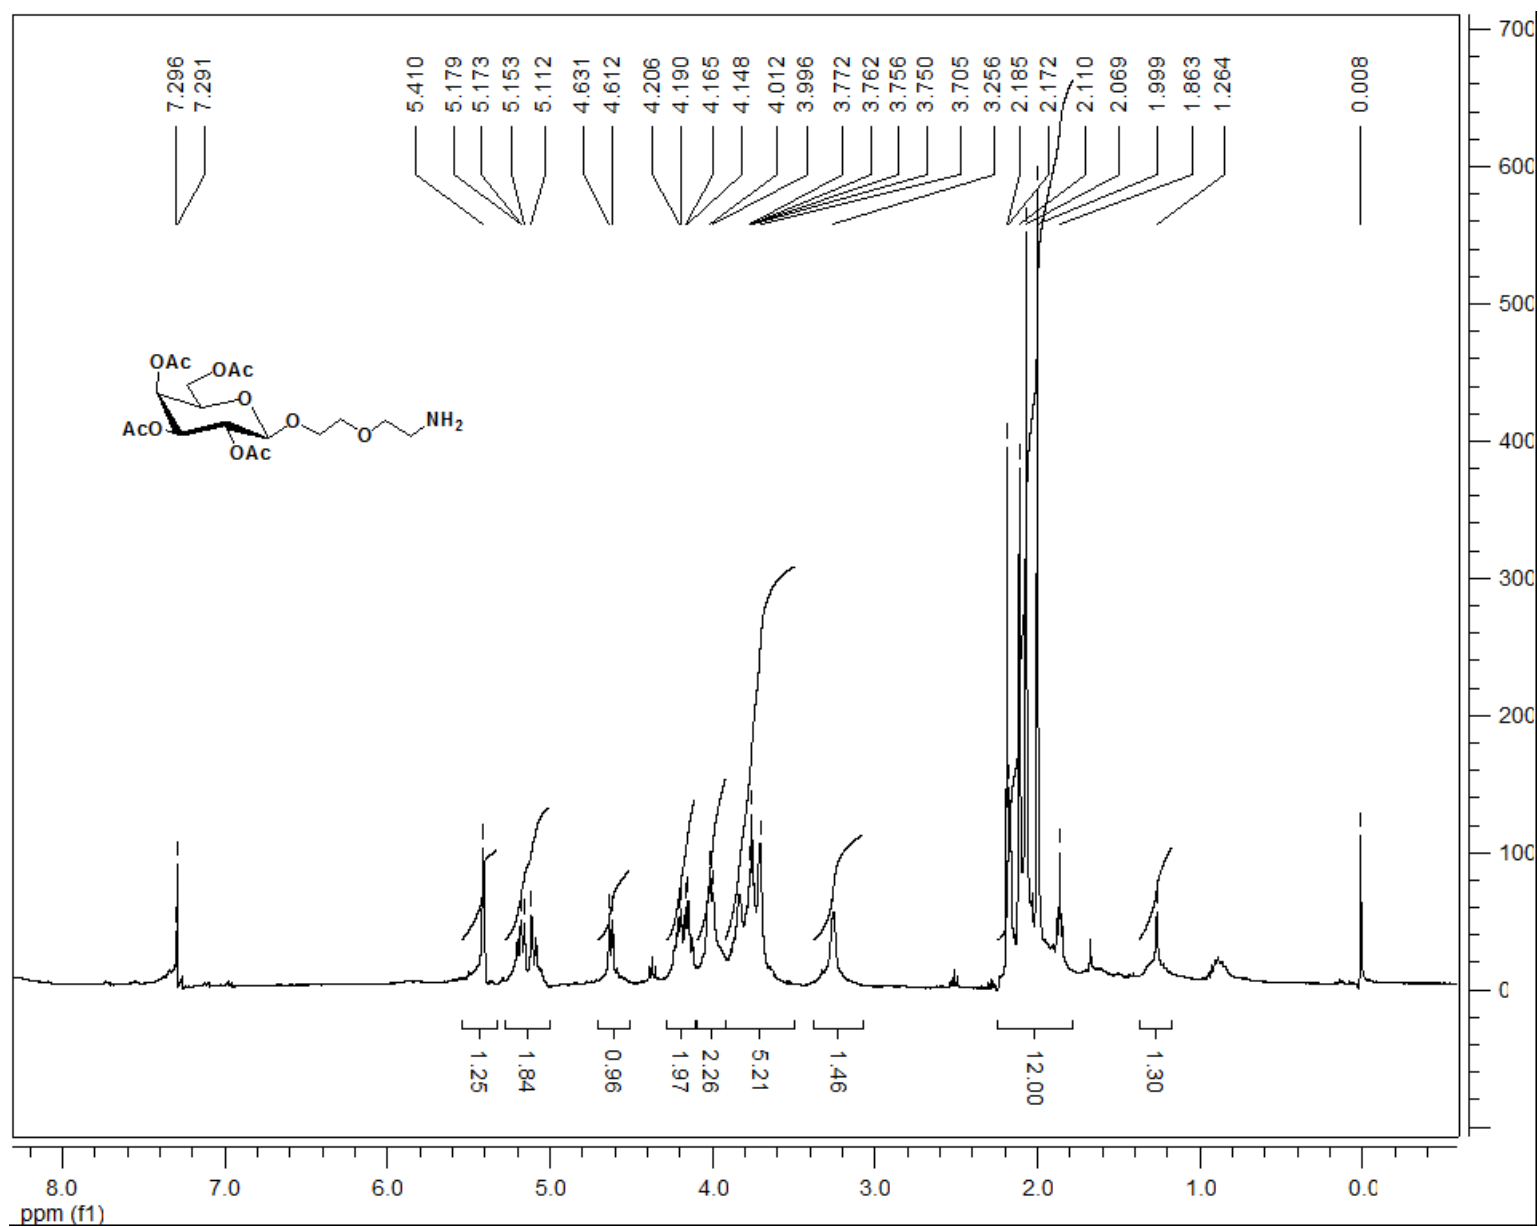

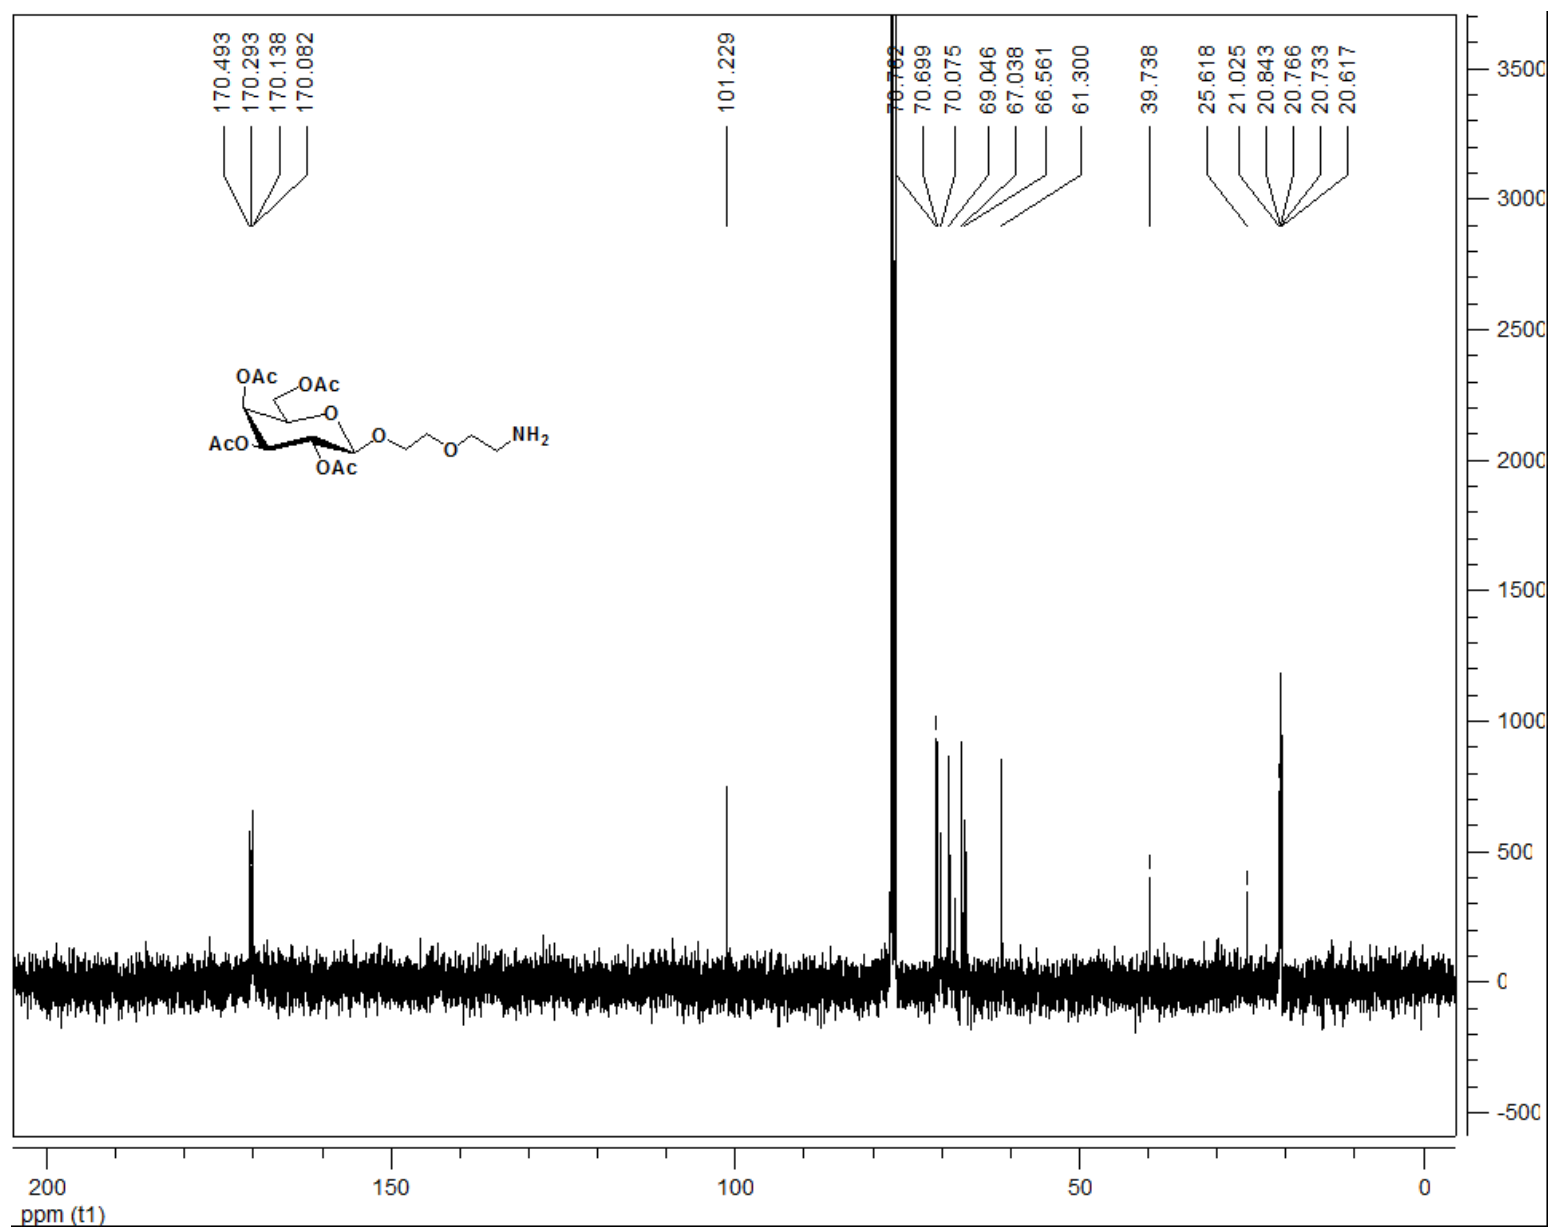

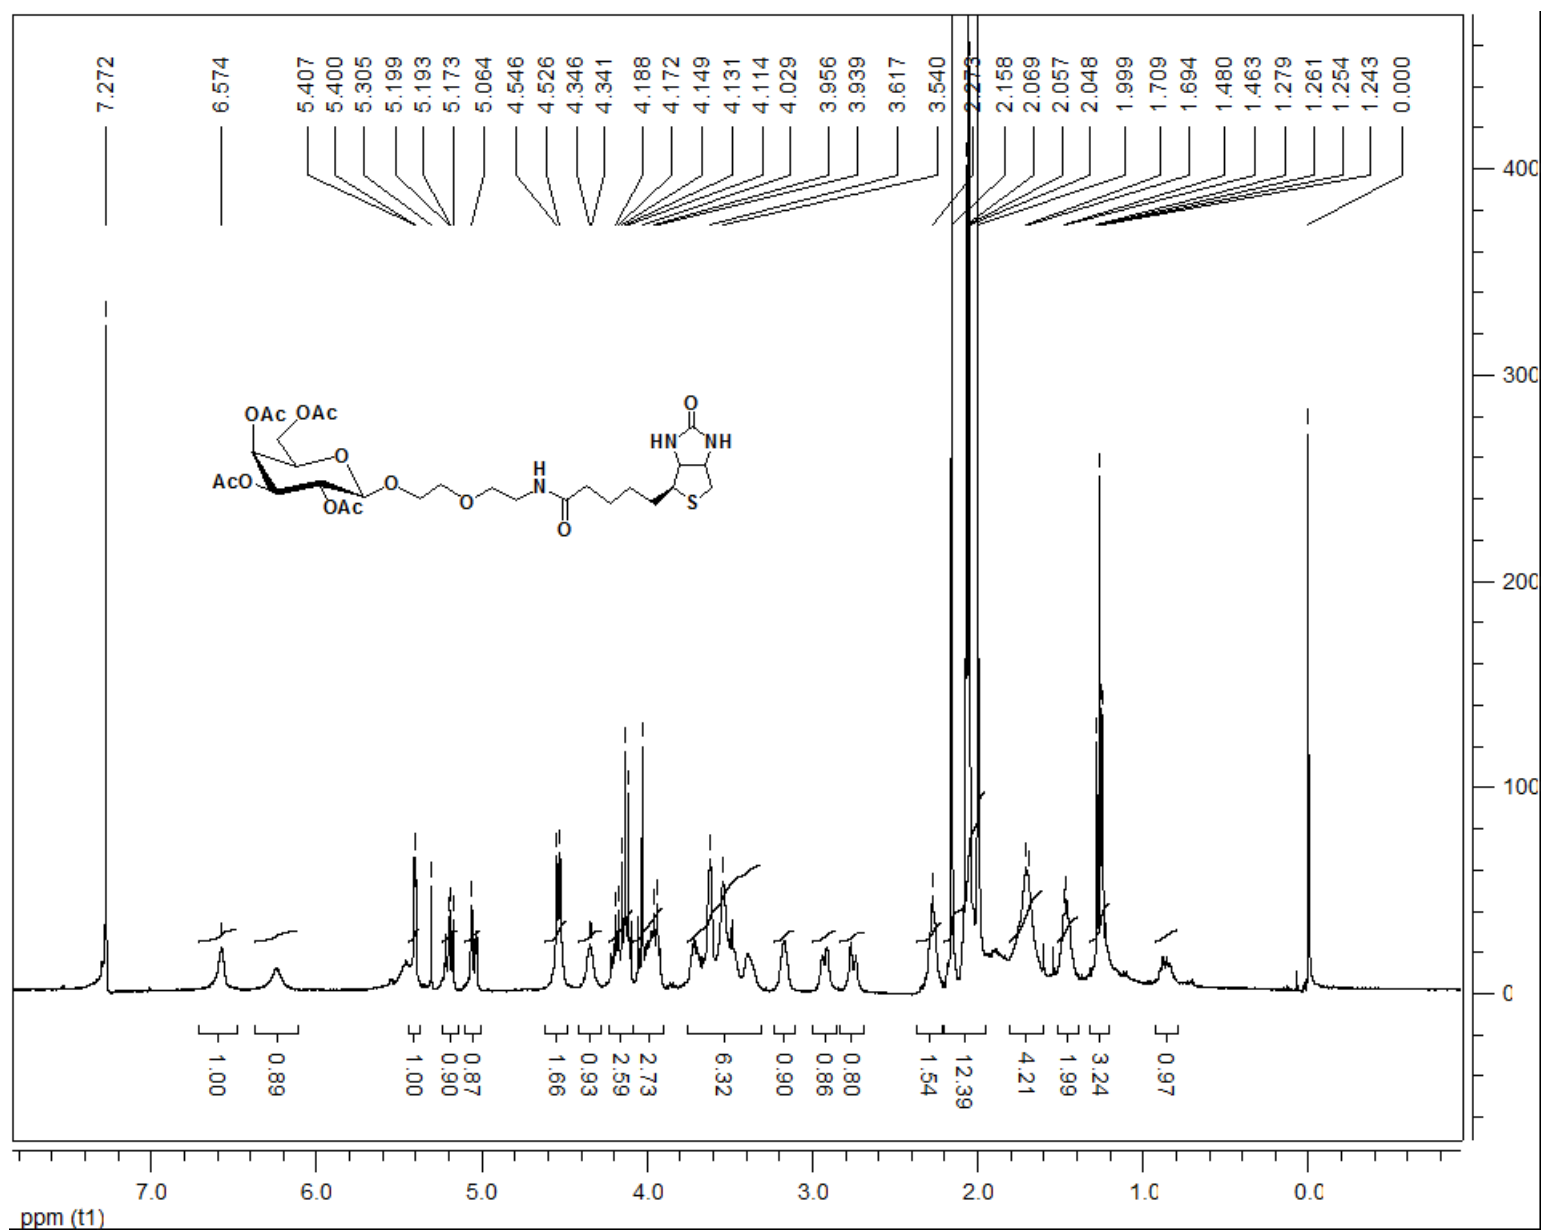

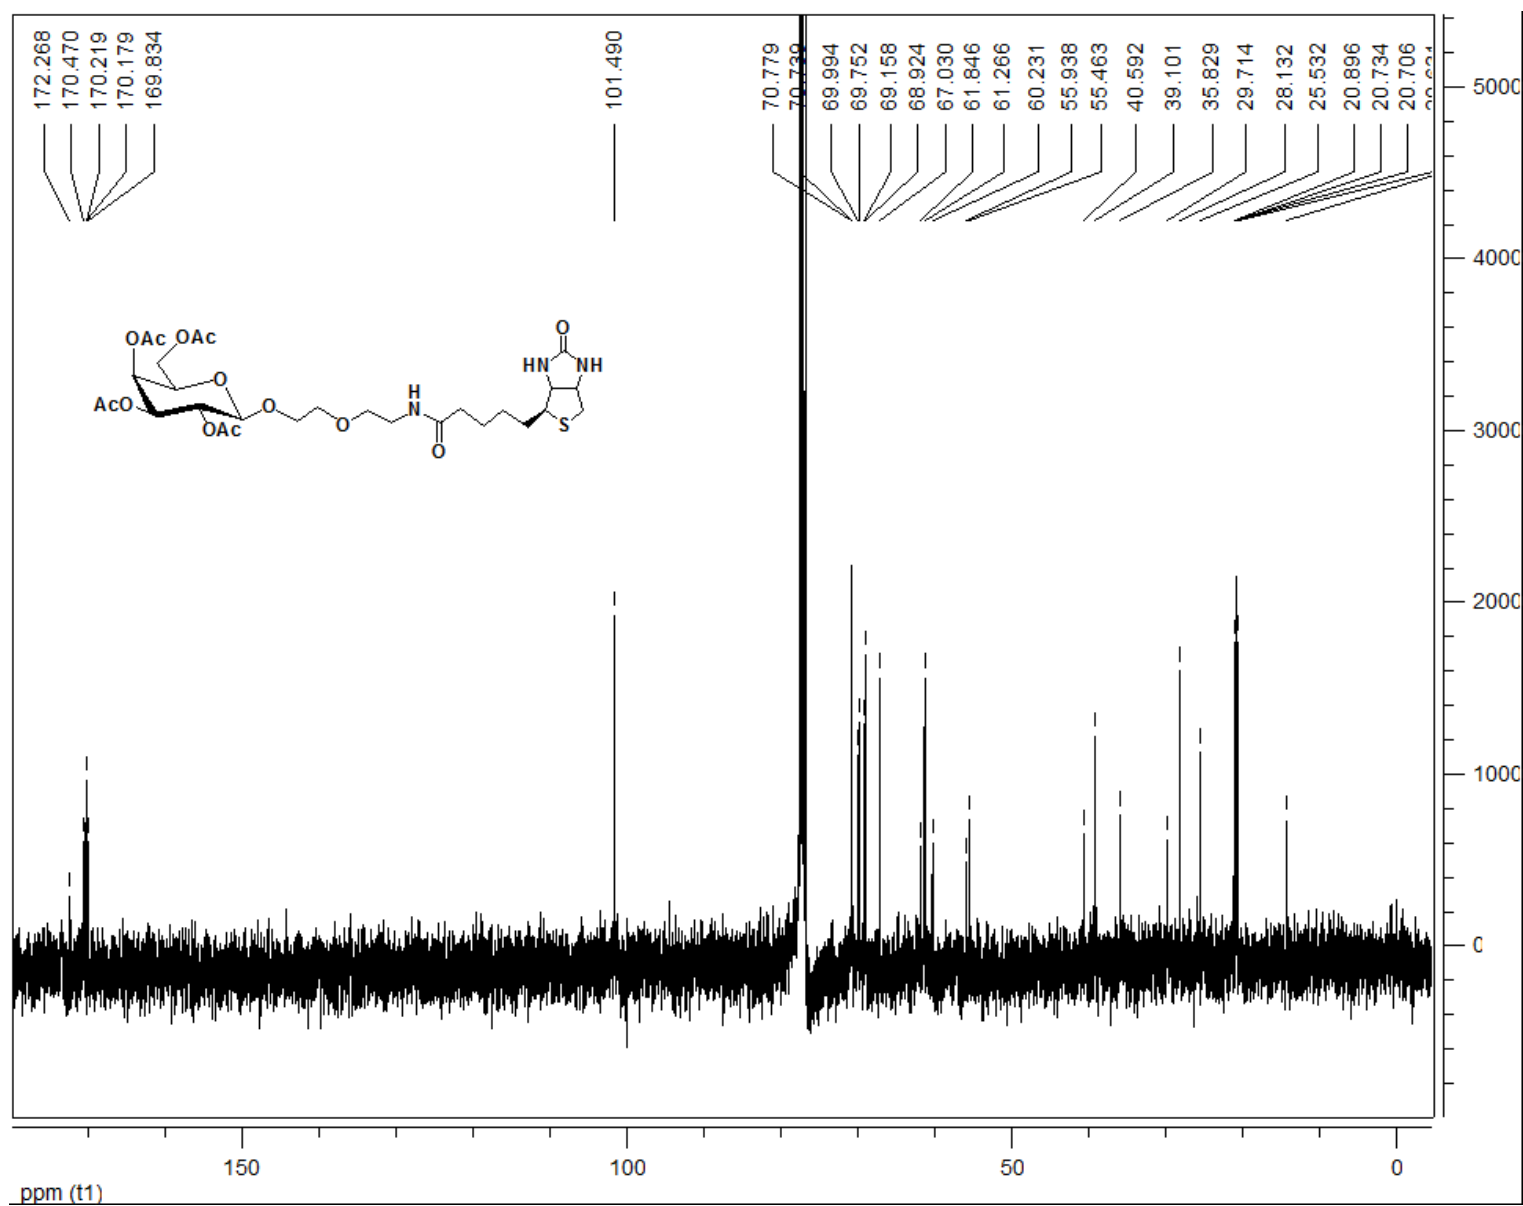

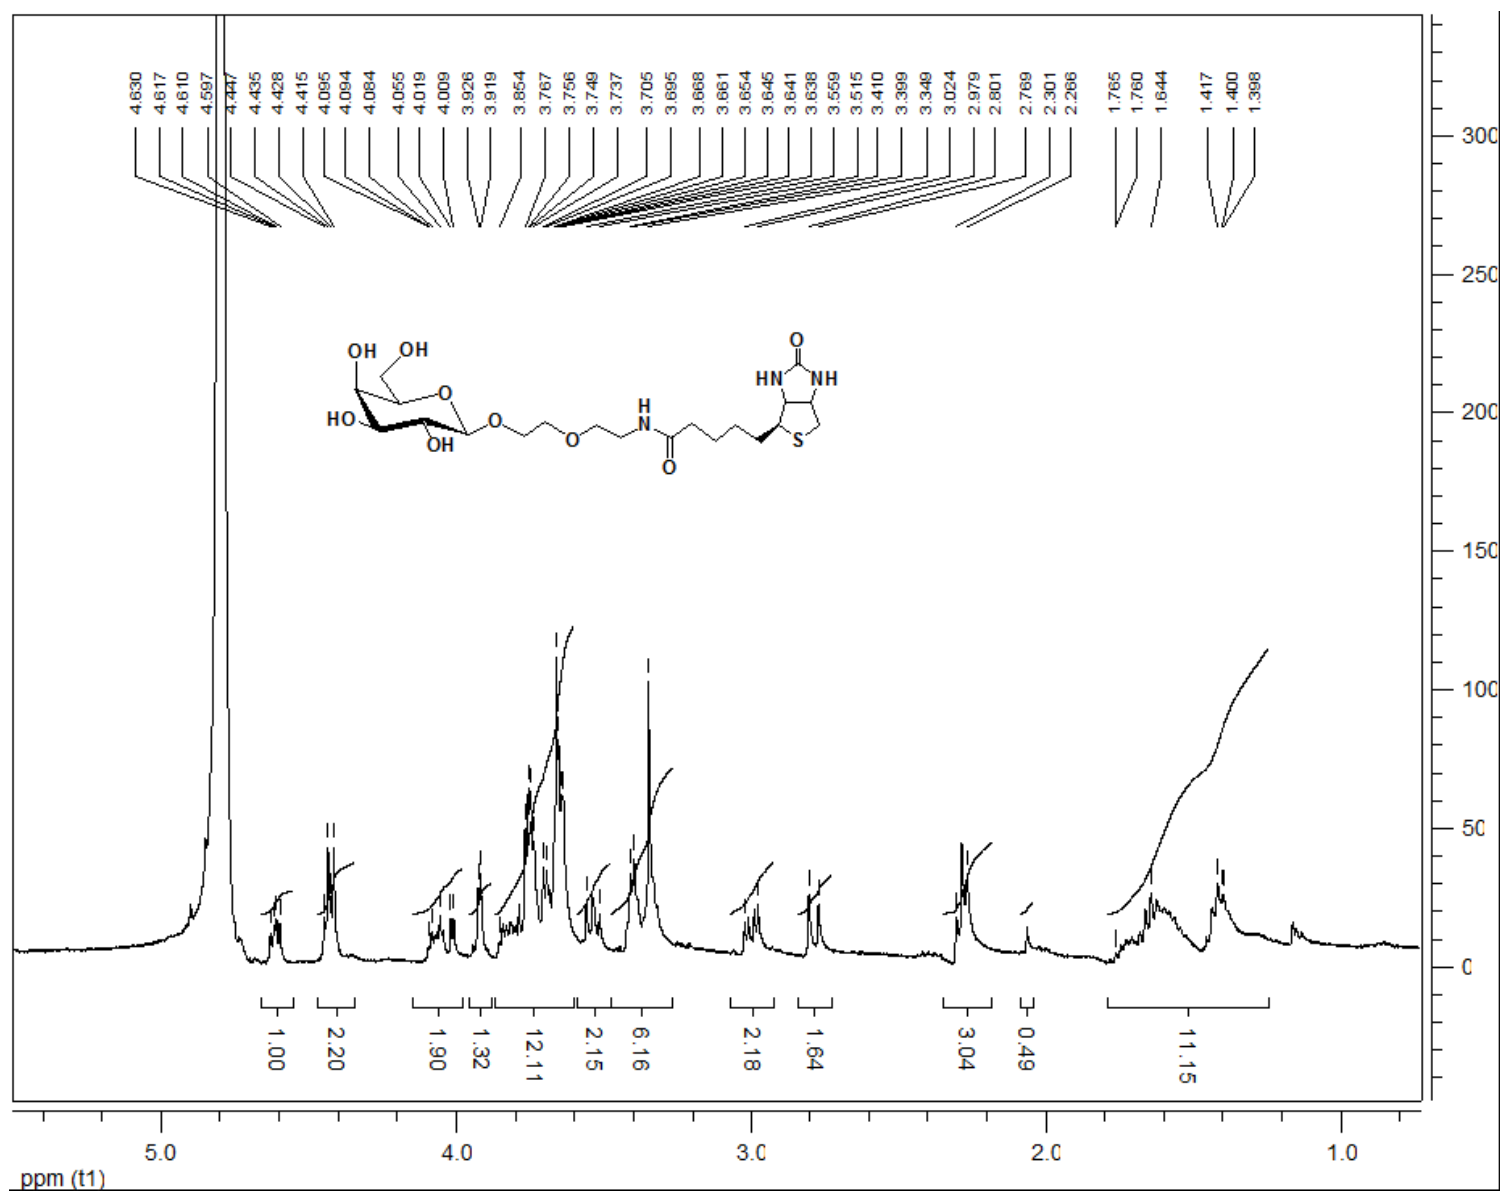

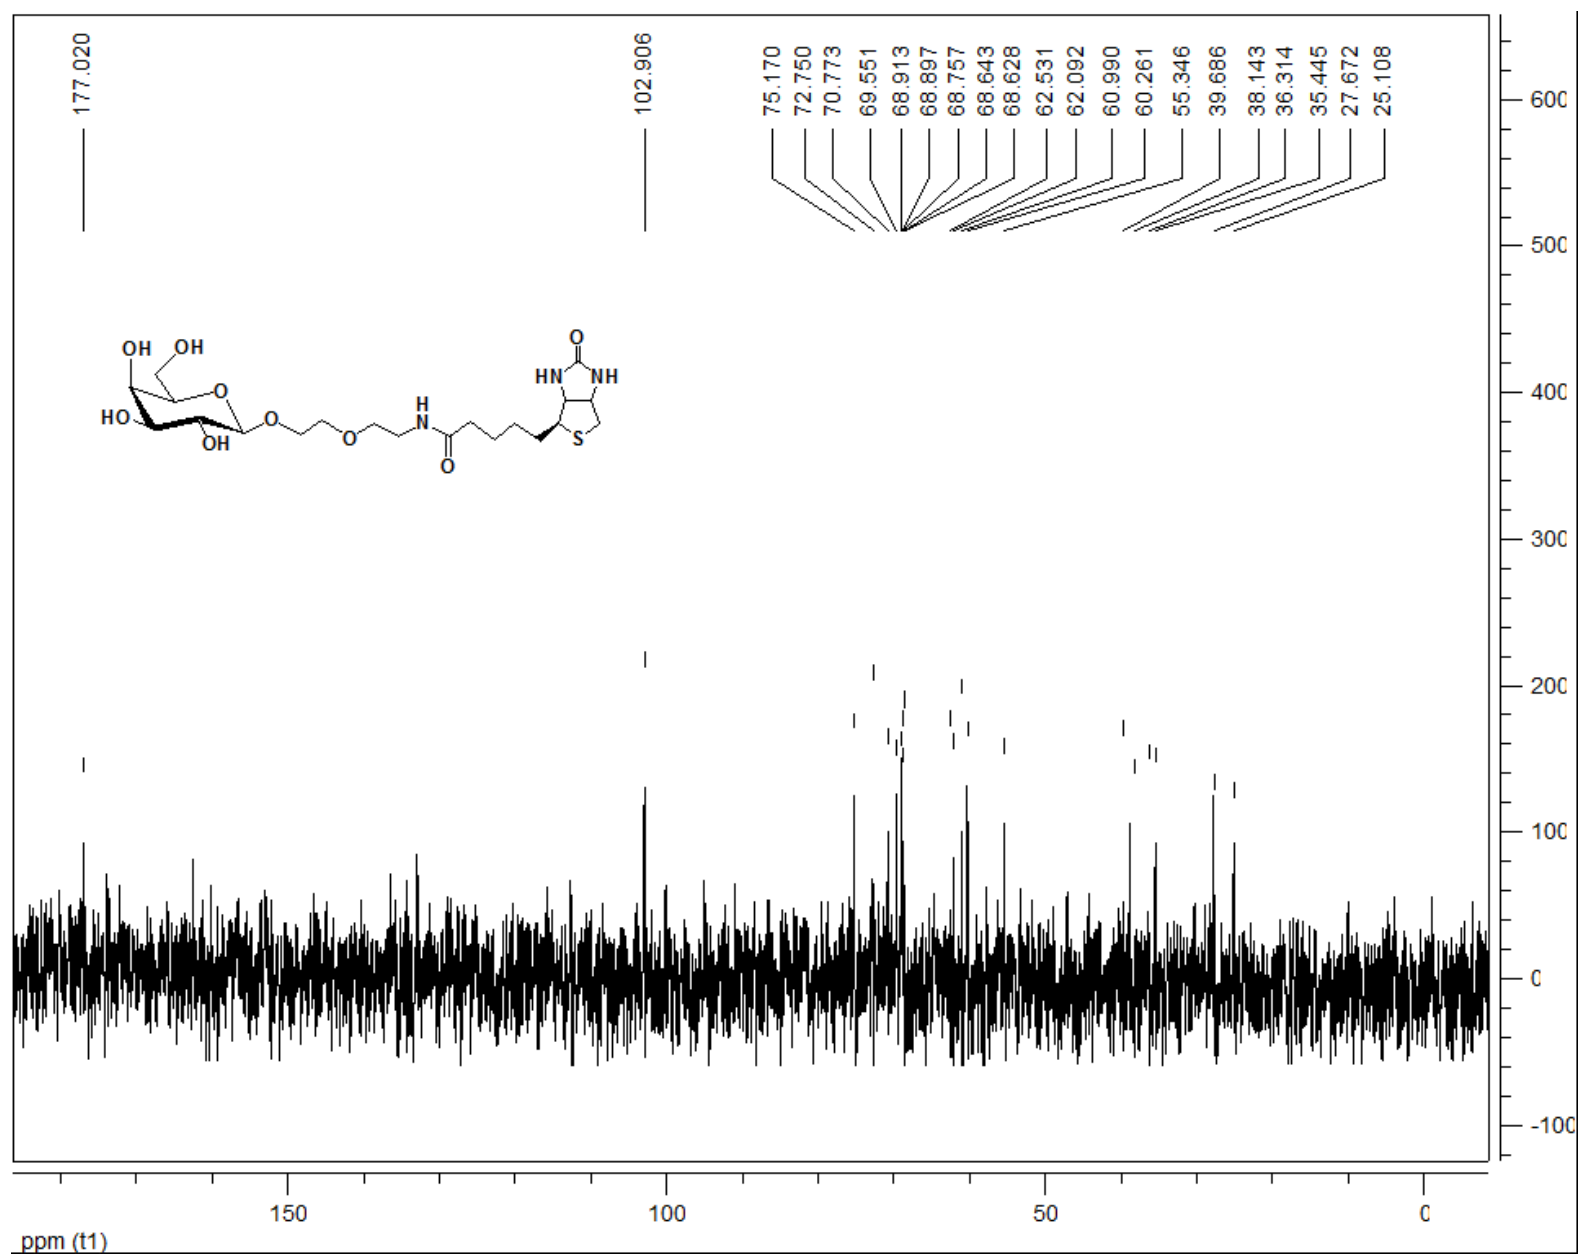

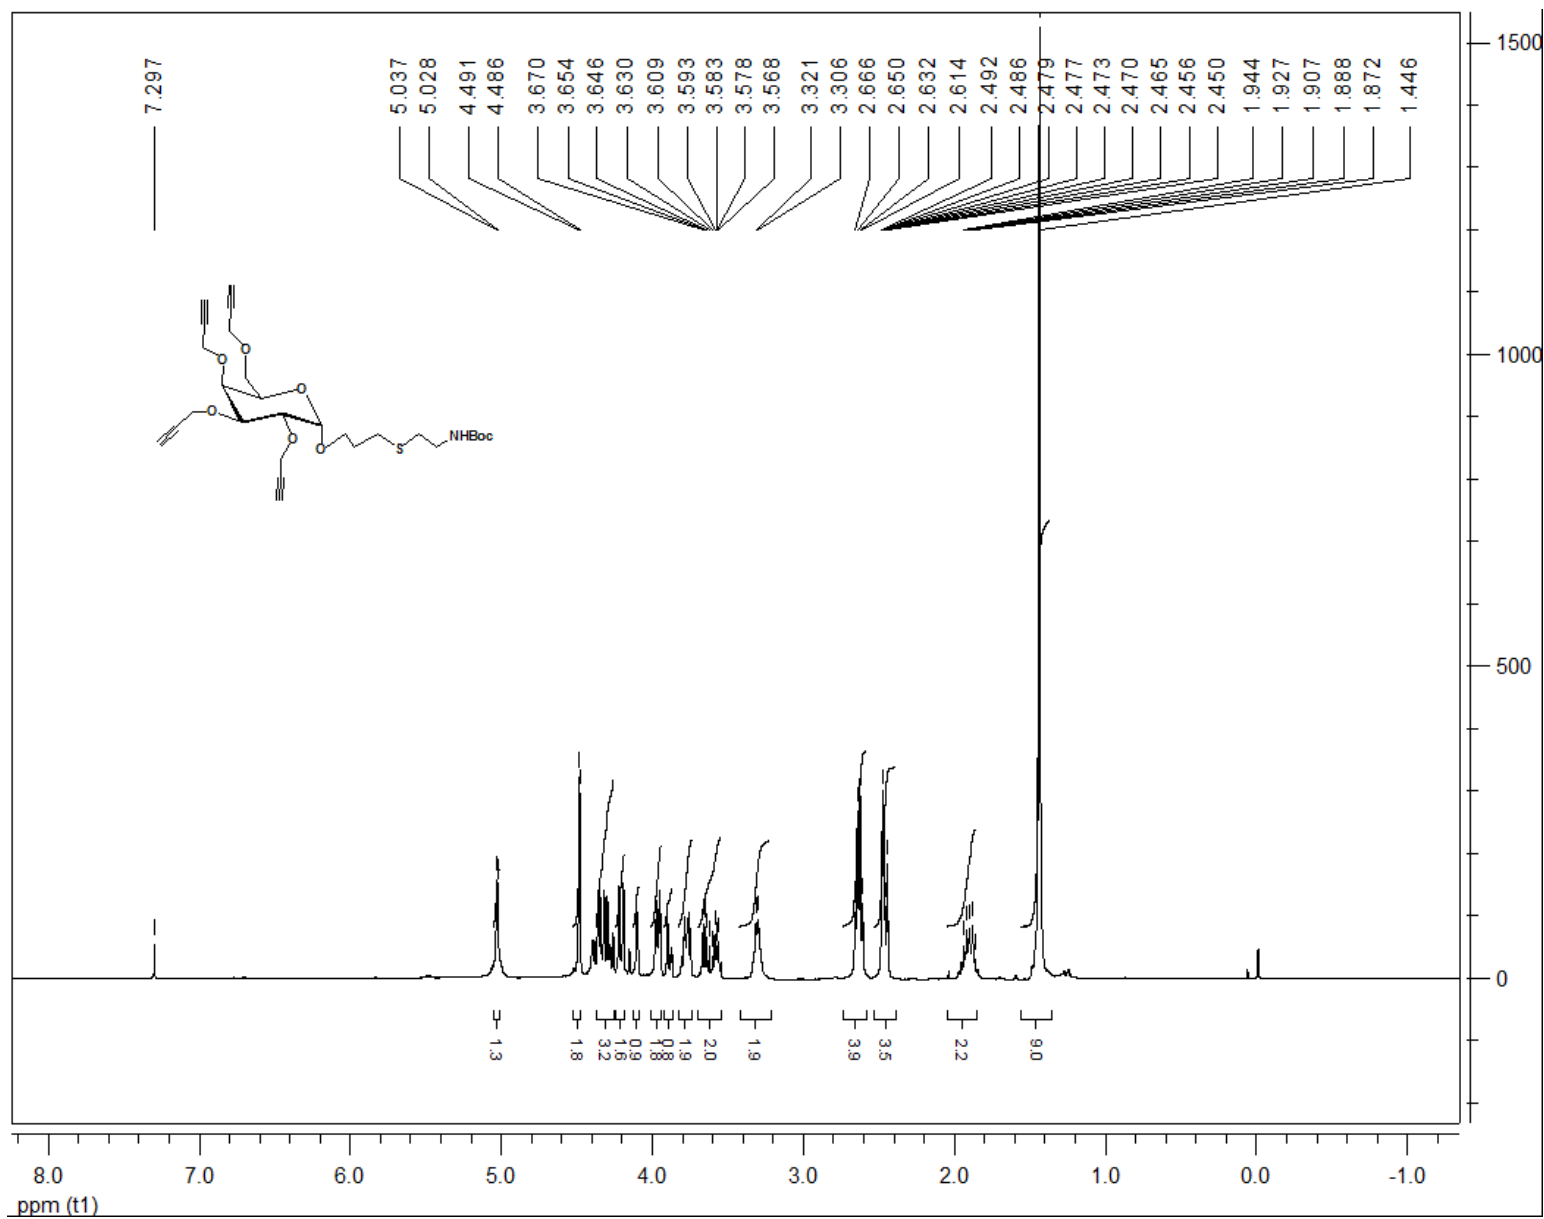



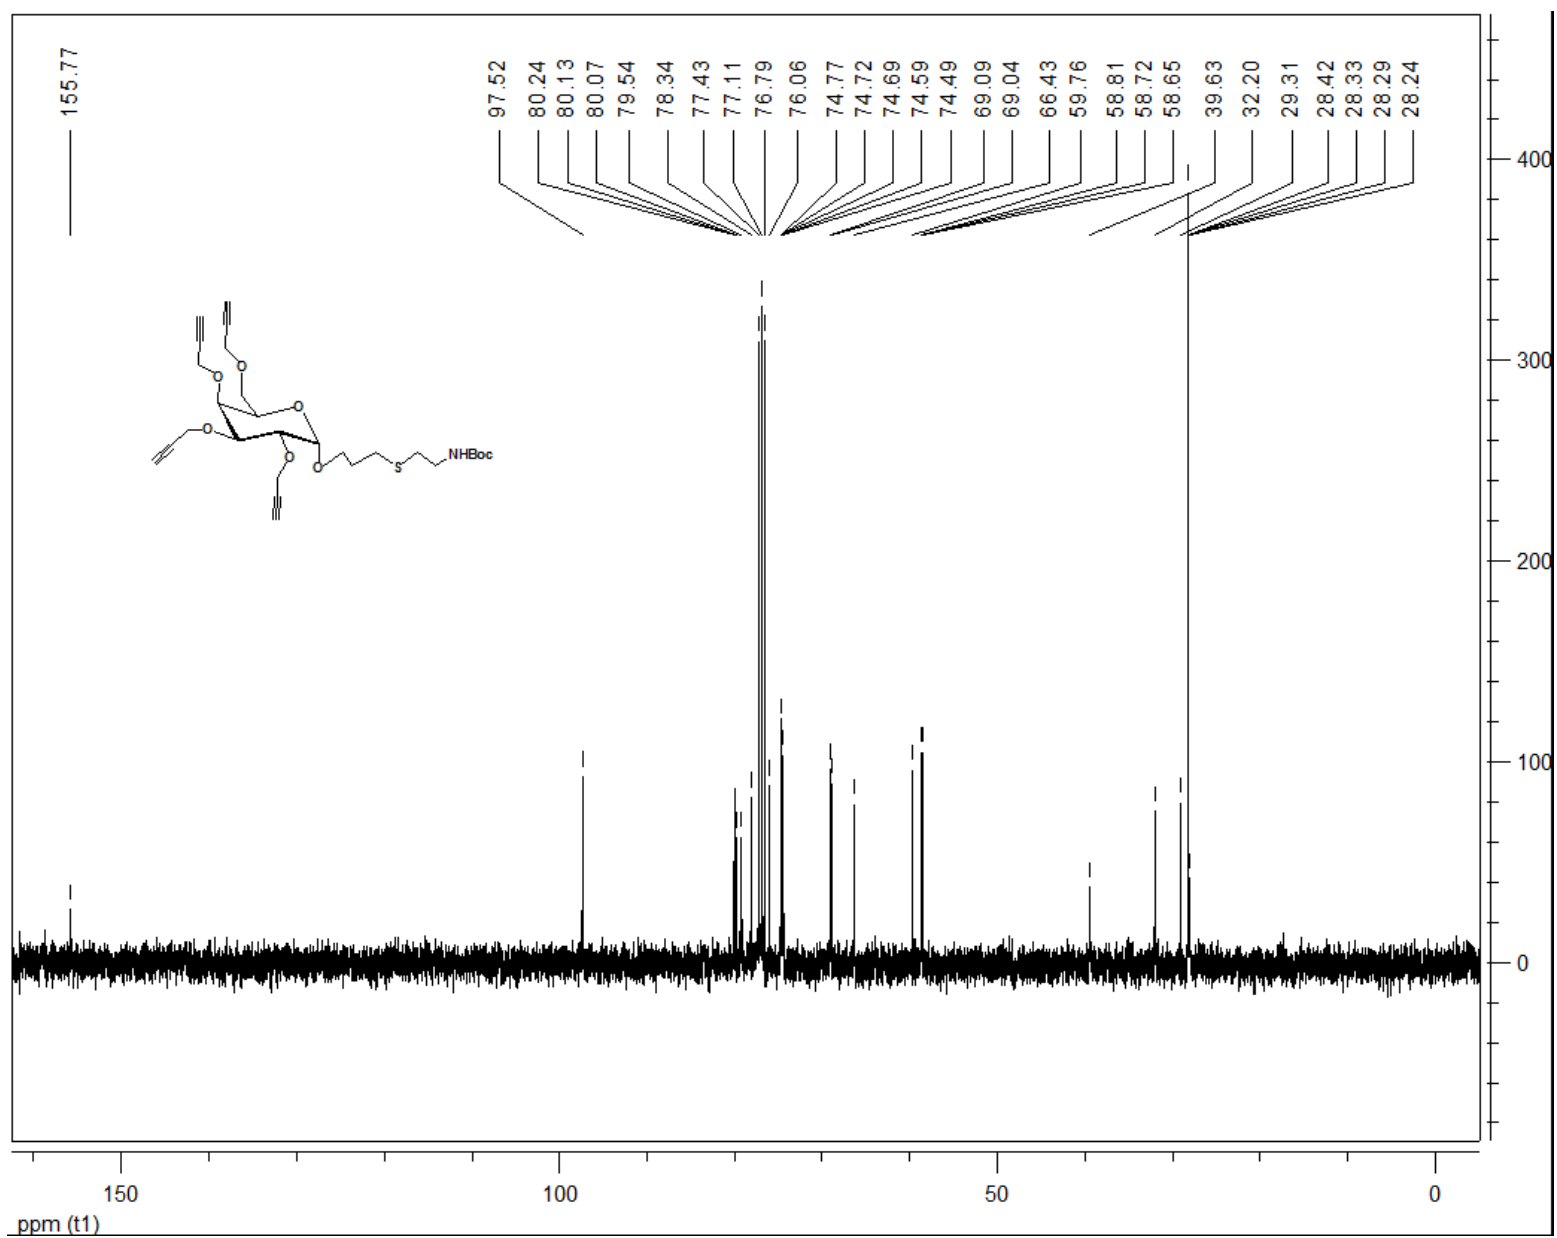

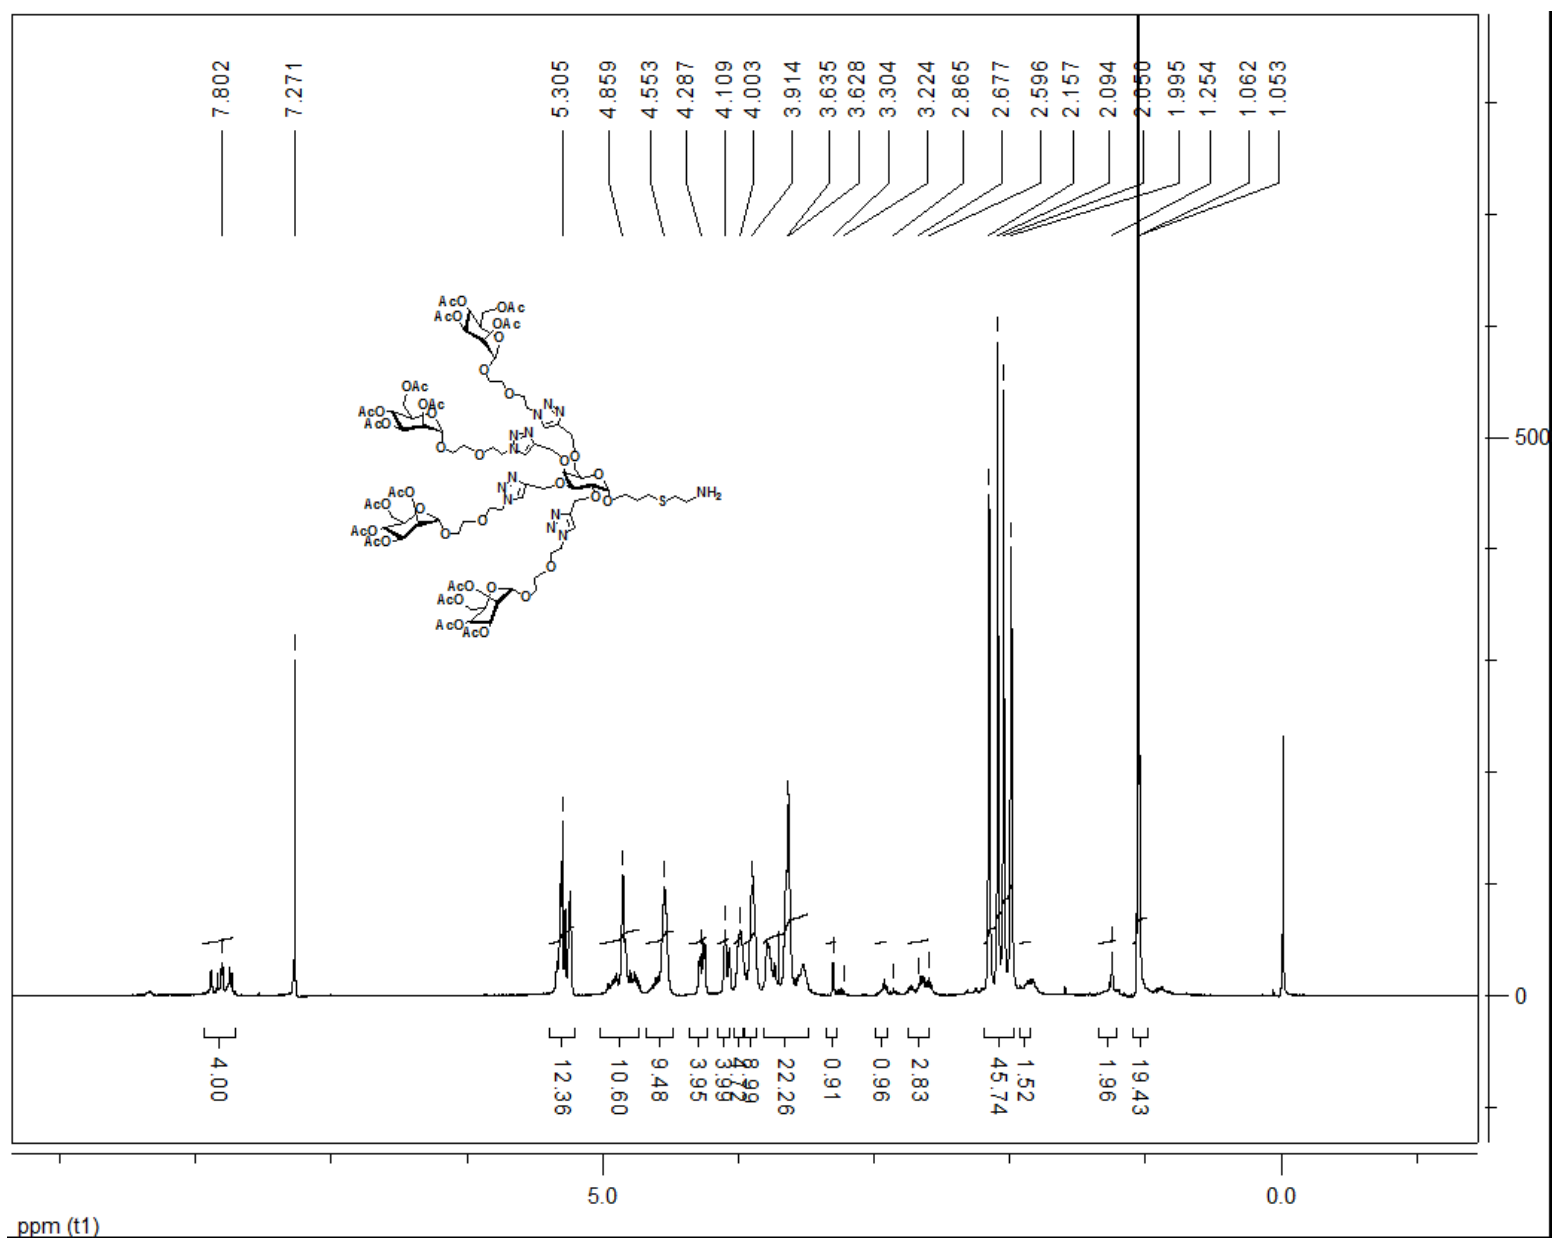

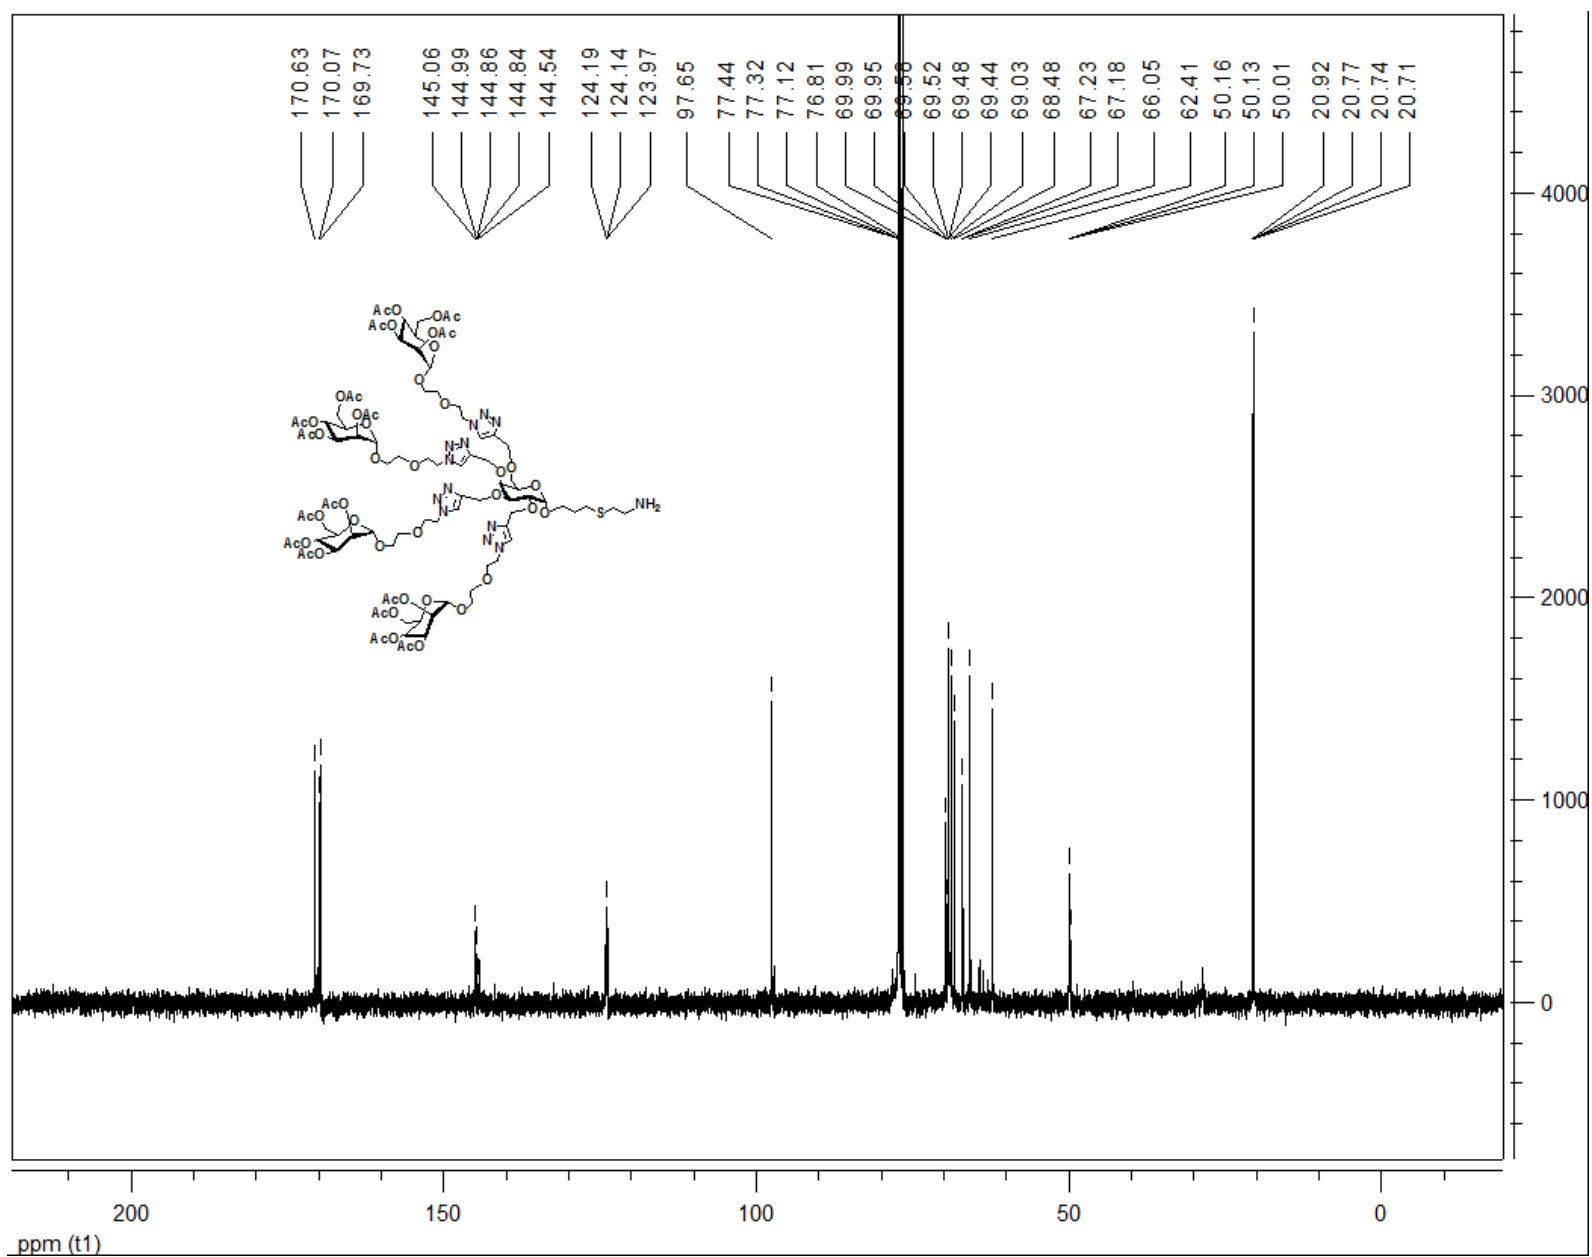

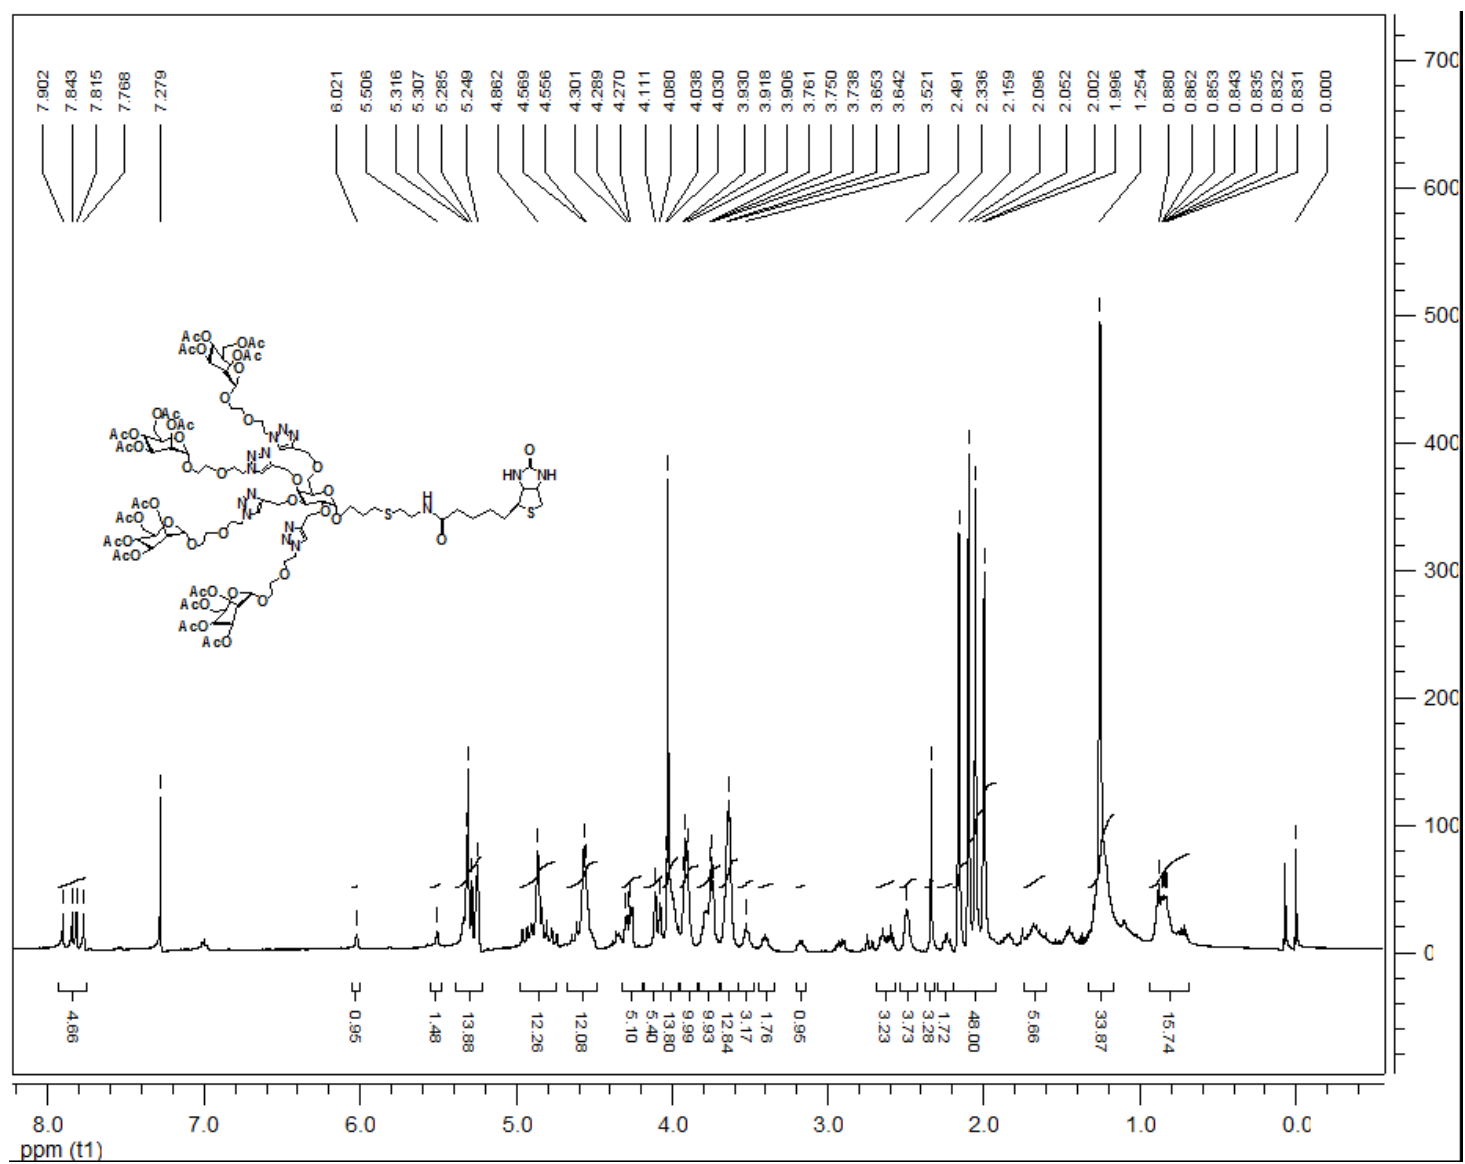

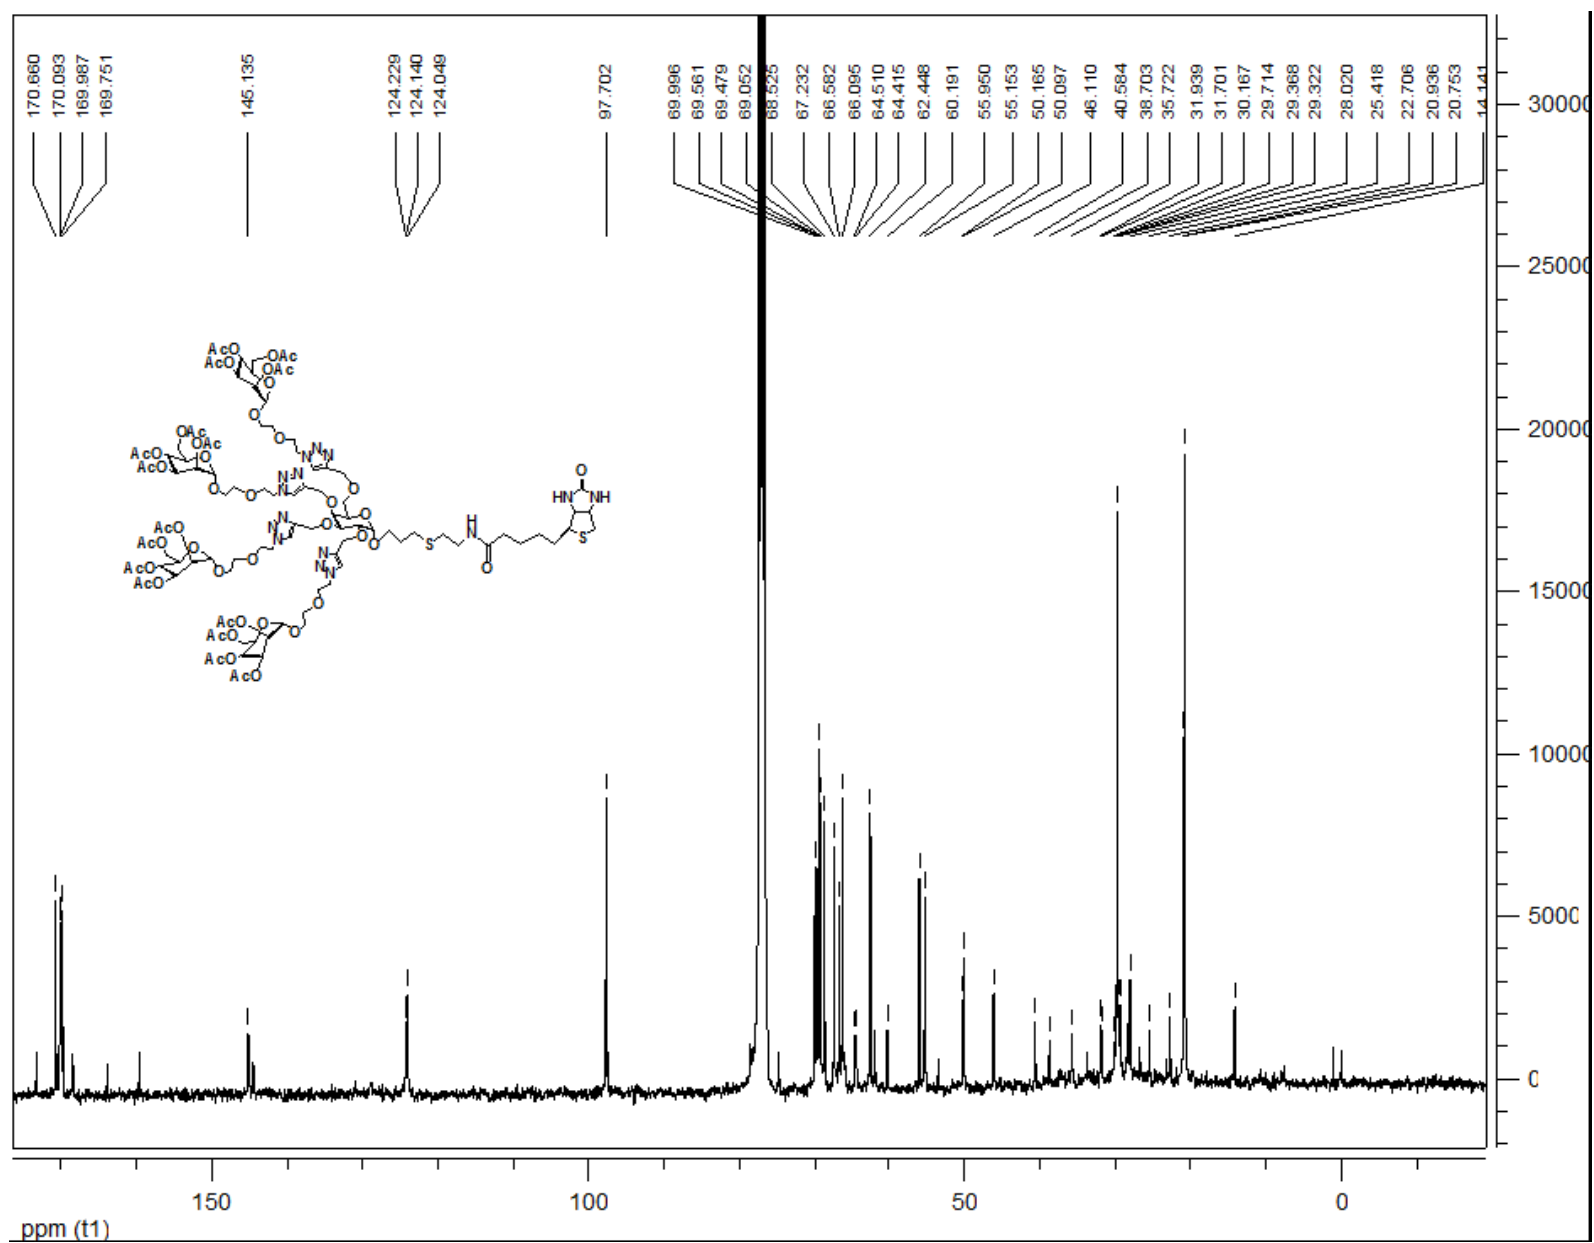

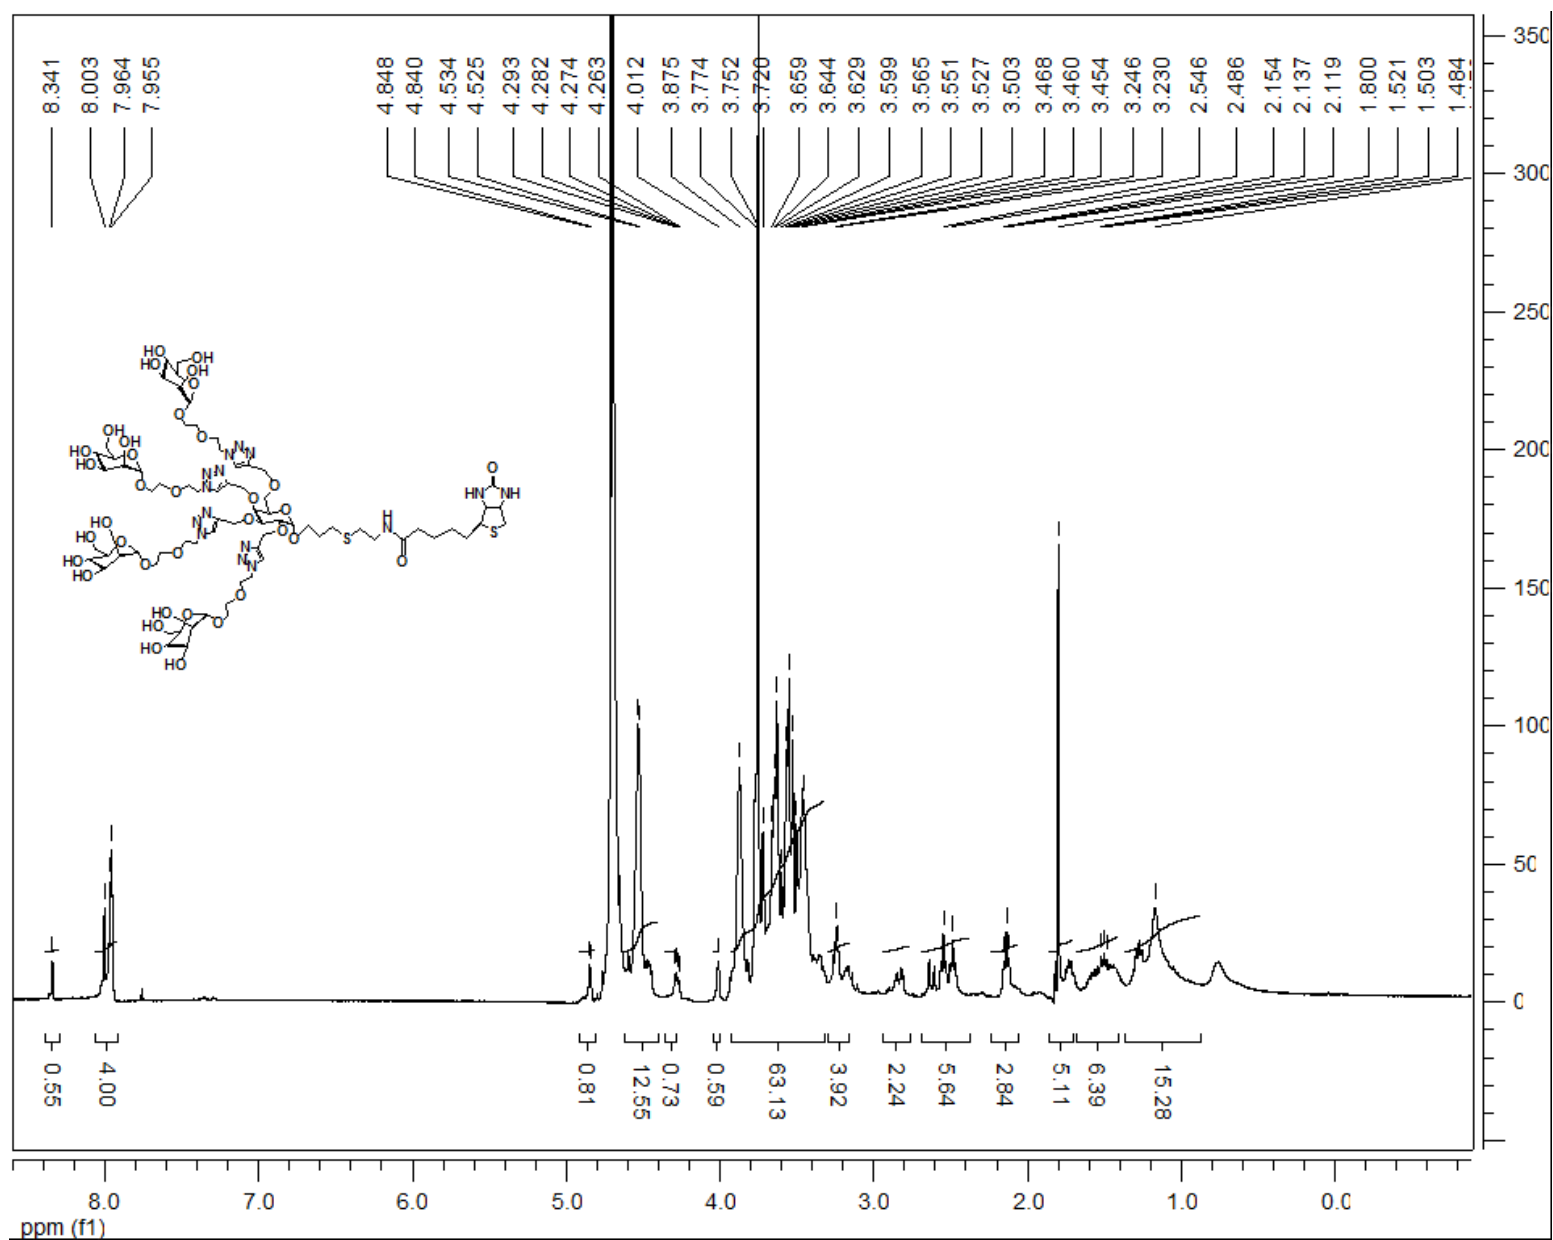

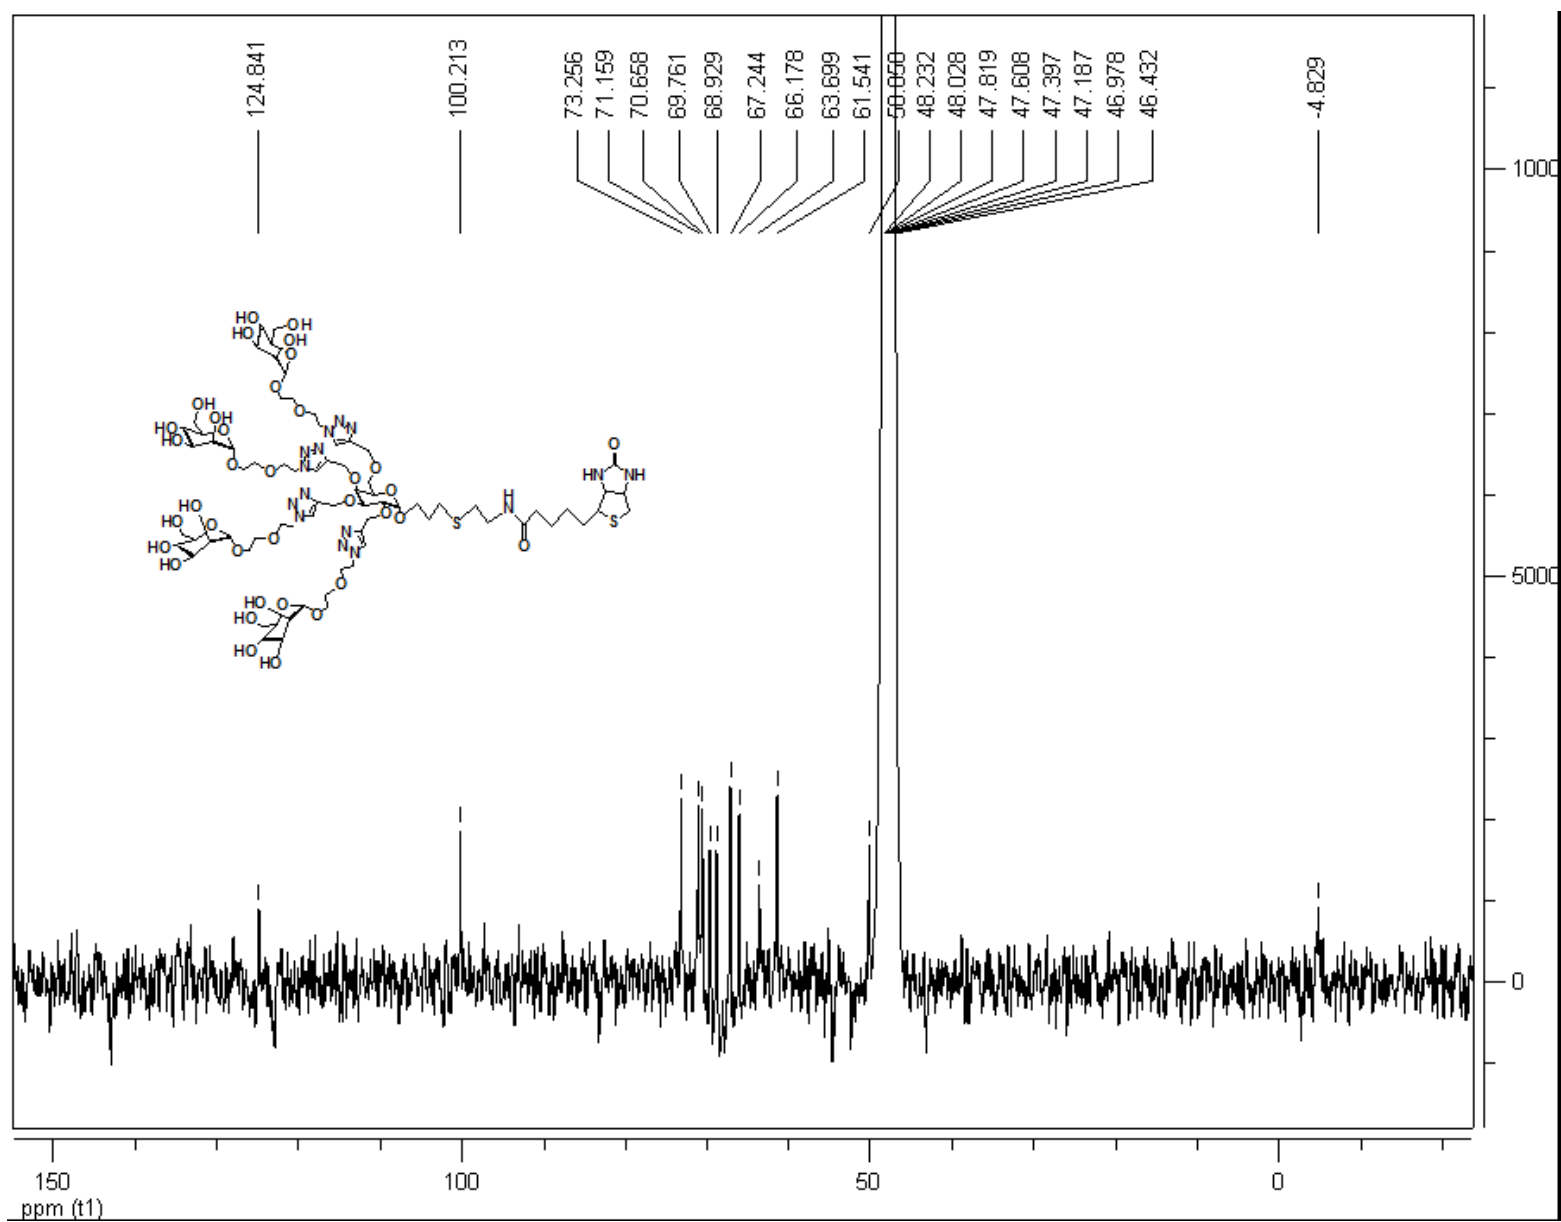

## H. References.

- (1) Wolfenden, M. L.; Cloninger, M. J. *J. Am. Chem. Soc.* **2005**, *127*, 12168-12169.
- (2) Kale, R. R.; McGannon, C. M.; Fuller-Schaefer, C.; Hatch, D. M.; Flagler, M. J.; Gamage, S. D.; Weiss, A. A.; Iyer, S. S. *Angew. Chem. Int. Ed. Engl.* **2008**, *47*, 1265-1268.
- (3) Ballut, S.; Makky, A.; Looock, B.; Michel, J. P.; Maillard, P.; Rosilio, V. *Chem. Commun. (Camb)* **2009**, 224-226.
- (4) Sasaki, A.; Murahashi, N.; Yamada, H.; Morikawa, A. *Biol. Pharm. Bull.* **1995**, *18*, 740-745.
- (5) Koh, I.; Hong, R.; Weissleder, R.; Josephson, L. *Angew. Chem. Int. Ed. Engl.* **2008**, *47*, 4119-4121.
- (6) Bouckaert, J.; Hamelryck, T. W.; Wyns, L.; Loris, R. *J. Biol. Chem.* **1999**, *274*, 29188-29195.
- (7) Hester, G.; Kaku, H.; Goldstein, I. J.; Wright, C. S. *Nat. Struct. Biol.* **1995**, *2*, 472-479.
